# Supplementary material for: Highly efficient asymmetric Michael addition of aldehyde to nitroolefin using perhydroindolic acid as a chiral organocatalyst
Source: Royal Society of Chemistry journal article supplement (doi:10.1039/c2ob00003b), 2012-01-01

## Supporting Information

# Highly efficient asymmetric Michael addition of aldehyde to nitroolefin using perhydroindolic acid as a chiral organocatalyst

Lina Zhao,<sup>a</sup> Jiefeng Shen,<sup>a</sup> Delong Liu,<sup>b</sup> Yangang Liu<sup>b</sup> and Wanbin Zhang<sup>a,b\*</sup>

<sup>a</sup> School of Chemistry and Chemical Engineering, Shanghai Jiao Tong University, 800 Dongchuan Road, Shanghai 200240, P. R. China. Fax: +86-21-5474-3265; Tel: +86-21-5474-3265; E-mail: wanbin@sjtu.edu.cn

<sup>b</sup> School of Pharmacy, Shanghai Jiao Tong University, 800 Dongchuan Road, Shanghai 200240, P. R. China.

## CONTENTS

|    |                                                           |    |
|----|-----------------------------------------------------------|----|
| 1. | General .....                                             | 2  |
| 2. | General Procedure for the Michael addition reaction ..... | 2  |
| 3. | Characterization Data of Michael adducts .....            | 2  |
| 4. | HPLC Spectra .....                                        | 11 |
| 5. | NMR Spectrum .....                                        | 31 |

## 1. General

$^1\text{H}$  NMR (400 MHz) and  $^{13}\text{C}$  NMR (100 MHz) spectra were recorded on a Varian MERCURY plus-400 spectrometer with TMS as an internal standard. HRMS was performed on the Analysis Center of Shanghai Jiao Tong University. The enantioselectivity was measured by high performance liquid chromatography (HPLC) using Daicel Chiralcel AD-H, OD-H, AS-H, OJ-H and OZ-H column with hexane/2-propyl alcohol as eluent. Column chromatography was performed using 100-200 mesh silica gel. All commercially available substrates were used as received. Nitroolefins were prepared according to the literature procedures.<sup>1</sup>

## 2. General Procedure for the Michael addition reaction

The catalyst **1d** (1.69 mg, 0.01 mmol), DIPEA (1.75  $\mu\text{L}$ , 0.01 mmol) and aldehyde (2 mmol) were dissolved in DCM (1 mL) at 0 °C. The solution was stirred for 5 min, and then appropriate nitroolefin (0.2 mmol) was added. The reaction mixture was then stirred at 0 °C until the complete consumption of nitroolefin (monitored by TLC). The solvent was evaporated and the residue was purified by flash column silica-gel chromatography (PE / EA = 8 / 1) to provide the corresponding Michael adducts. Diastereoselectivity were measured by  $^1\text{H}$  NMR analysis of the crude product directly. The enantiomeric excess (ee) was determined by HPLC analysis of pure product. The absolute configurations of the products were determined by comparing with preciously reported literature data.<sup>2,3</sup>

## 3. Characterization Data of Michael adducts

### (2*R*,3*S*)-2-ethyl-4-nitro-3-phenylbutanal (**6aa**)<sup>2b</sup>

Pale yellow oil.  $^1\text{H}$  NMR (400 MHz,  $\text{CDCl}_3$ ):  $\delta$  9.71 (d,  $J = 2.5$  Hz, 1H), 7.38 – 7.14 (m, 5H), 4.75 – 4.58 (m, 2H), 3.83 – 3.74 (m, 1H), 2.72 – 2.63 (m, 1H), 1.55 – 1.45 (m, 2H), 0.83 (t,  $J = 7.5$

Hz, 3H). HPLC conditions: The enantiomeric excess was determined by HPLC (Chiralcel OD-H), Hex: *i*-PrOH 91:9, UV 230 nm, 0.9ml/min, syn:  $t_R = 32.96$  min (major) and  $t_R = 24.73$  min (minor).

**(2R,3S)-2-methyl-4-nitro-3-phenylbutanal (6ba)<sup>2b</sup>**

Pale yellow oil. <sup>1</sup>H NMR (400 MHz, CDCl<sub>3</sub>):  $\delta$  9.70 (d,  $J = 1.8$  Hz, 1H), 7.37 – 7.12 (m, 5H), 4.83 – 4.75 (m, 1H), 4.72 – 4.64 (m, 1H), 3.86 – 3.74 (m, 1H), 2.85 – 2.70 (m, 1H), 0.99 (d,  $J = 7.2$  Hz, 3H). HPLC conditions: The enantiomeric excess was determined by HPLC (Chiralcel OD-H), Hex: *i*-PrOH 90:10, UV 210 nm, 0.8ml/min, syn:  $t_R = 48.66$  min (major) and  $t_R = 31.92$  min (minor).

**(2R,3S)-2-isopropyl-4-nitro-3-phenylbutanal (6ca)<sup>2b</sup>**

Pale yellow oil. <sup>1</sup>H NMR (400 MHz, CDCl<sub>3</sub>):  $\delta$  9.92 (d,  $J = 2.4$  Hz, 1H), 7.38 – 7.25 (m, 3H), 7.21 – 7.15 (m, 2H), 4.70 – 4.63 (m, 1H), 4.61 – 4.53 (m, 1H), 3.94 – 3.85 (m, 1H), 2.80 – 2.74 (m, 1H), 1.77 – 1.66 (m, 1H), 1.09 (d,  $J = 7.2$  Hz, 3H), 0.88 (d,  $J = 7.0$  Hz, 3H). HPLC conditions: The enantiomeric excess was determined by HPLC (Chiralcel OD-H), Hex: *i*-PrOH 95:5, UV 210 nm, 0.8ml/min, syn:  $t_R = 27.20$  min (major) and  $t_R = 25.67$  min (minor).

**(R)-2-((S)-2-nitro-1-phenylethyl)hexanal (6ea)<sup>2b</sup>**

Pale yellow oil. <sup>1</sup>H NMR (400 MHz, CDCl<sub>3</sub>):  $\delta$  9.70 (d,  $J = 2.7$  Hz, 1H), 7.44 – 7.15 (m, 5H), 4.84 – 4.57 (m, 2H), 3.86 – 3.72 (m, 1H), 2.81 – 2.63 (m, 1H), 1.52 – 1.07 (m, 6H), 0.78 (t,  $J = 6.8$

Hz, 3H). HPLC conditions: The enantiomeric excess was determined by HPLC (Chiralcel OD-H), Hex: *i*-PrOH 90:10, UV 210 nm, 0.8 ml/min, syn:  $t_R$  = 28.48 min (major) and  $t_R$  = 21.13 min (minor).

**(2*R*,3*S*)-3-(4-chlorophenyl)-2-methyl-4-nitrobutanal (6bb)<sup>2b</sup>**

Pale yellow oil. <sup>1</sup>H NMR (400 MHz, CDCl<sub>3</sub>):  $\delta$  9.69 (d,  $J$  = 1.5 Hz, 1H), 7.36 – 7.28 (m, 2H), 7.15 – 7.09 (m, 2H), 4.82 – 4.73 (m, 1H), 4.68 – 4.59 (m, 1H), 3.83 – 3.75 (m, 1H), 2.81 – 2.70 (m, 1H), 1.00 (d,  $J$  = 7.2 Hz, 3H). HPLC conditions: The enantiomeric excess was determined by HPLC (Chiralcel AD-H), Hex: *i*-PrOH 97:3, UV 210 nm, 0.9 ml/min, syn:  $t_R$  = 24.16 min (major) and  $t_R$  = 33.93 min (minor).

**(2*R*,3*S*)-3-(3-chlorophenyl)-2-methyl-4-nitrobutanal (6bc)<sup>3a</sup>**

Pale yellow oil. <sup>1</sup>H NMR (400 MHz, CDCl<sub>3</sub>)  $\delta$  9.69 (d,  $J$  = 1.5 Hz, 1H), 7.32 – 6.97 (m, 4H), 4.84 – 4.75 (m, 1H), 4.69 – 4.61 (m, 1H), 3.82 – 3.74 (m, 1H), 2.82 – 2.70 (m, 1H), 1.01 (d,  $J$  = 7.3 Hz, 3H). HPLC conditions: The enantiomeric excess was determined by HPLC (Chiralcel OZ-H), Hex: *i*-PrOH 90:10, UV 210 nm, 0.8 ml/min, syn:  $t_R$  = 35.05 min (major) and  $t_R$  = 29.42 min (minor).

**(2*R*,3*S*)-3-(4-fluorophenyl)-2-methyl-4-nitrobutanal (6bd)<sup>3b</sup>**

Pale yellow oil.  $^1\text{H}$  NMR (400 MHz,  $\text{CDCl}_3$ ):  $\delta$  9.70 (d,  $J = 1.5$  Hz, 1H), 7.22 – 7.11 (m, 2H), 7.07 – 6.99 (m, 2H), 4.83 – 4.73 (m, 1H), 4.68 – 4.59 (dd,  $J = 12.7, 9.6$  Hz, 1H), 3.85 – 3.75 (m, 1H), 2.84 – 2.66 (m, 1H), 1.00 (d,  $J = 7.4$  Hz, 3H). HPLC conditions: The enantiomeric excess was determined by HPLC (Chiralcel AD-H), Hex: *i*-PrOH 97:3, UV 210 nm, 0.9 ml/min, syn:  $t_{\text{R}} = 22.99$  min (major) and  $t_{\text{R}} = 30.86$  min (minor).

**(2*R*,3*S*)-2-methyl-4-nitro-3-(4-(trifluoromethyl)phenyl)butanal (6be)<sup>3d</sup>**

Pale yellow oil.  $^1\text{H}$  NMR (400 MHz,  $\text{CDCl}_3$ ):  $\delta$  9.70 (d,  $J = 1.4$  Hz, 1H), 7.61 (d,  $J = 8.2$  Hz, 2H), 7.32 (d,  $J = 8.1$  Hz, 2H), 4.87 – 4.79 (m, 1H), 4.75 – 4.65 (m, 1H), 3.96 – 3.84 (m, 1H), 2.90 – 2.75 (m, 1H), 1.00 (d,  $J = 7.4$  Hz, 3H). HPLC conditions: The enantiomeric excess was determined by HPLC (Chiralcel AD-H), Hex: *i*-PrOH 90:10, UV 210 nm, 0.8 ml/min, syn:  $t_{\text{R}} = 11.83$  min (major) and  $t_{\text{R}} = 15.00$  min (minor).

**(2*R*,3*S*)-3-(4-methoxyphenyl)-2-methyl-4-nitrobutanal (6bf)<sup>2b</sup>**

Pale yellow oil.  $^1\text{H}$  NMR (400 MHz,  $\text{CDCl}_3$ ):  $\delta$  9.69 (d,  $J = 1.7$  Hz, 1H), 7.17 – 6.97 (m, 2H), 6.95 – 6.77 (m, 2H), 4.82 – 4.70 (m, 1H), 4.67 – 4.58 (m, 1H), 3.77 (s, 3H), 3.76 – 3.71 (m, 1H), 2.81 – 2.63 (m, 1H), 0.98 (d,  $J = 7.3$  Hz, 3H). HPLC conditions: The enantiomeric excess was determined by HPLC (Chiralcel AS-H), Hex: *i*-PrOH 85:15, UV 210 nm, 0.8 ml/min, syn:  $t_{\text{R}} = 45.56$  min (major) and  $t_{\text{R}} = 35.23$  min (minor).

**(2*R*,3*S*)-3-(3-methoxyphenyl)-2-methyl-4-nitrobutanal (6bg)**

Pale yellow oil.  $^1\text{H}$  NMR (400 MHz,  $\text{CDCl}_3$ ):  $\delta$  9.69 (d,  $J = 1.6$  Hz, 1H), 7.27 – 7.21 (m, 1H), 6.83 – 6.67 (m, 3H), 4.80 – 4.73 (m, 1H), 4.69 – 4.62 (m, 1H), 3.78 (s, 3H), 3.84 – 3.72 (m, 1H), 2.83 – 2.69 (m, 1H), 1.00 (d,  $J = 7.3$  Hz, 3H).  $^{13}\text{C}$  NMR (100 MHz,  $\text{CDCl}_3$ ):  $\delta$  202.4, 160.1, 138.4, 130.3, 120.3, 114.6, 113.1, 78.2, 55.4, 48.6, 44.2, 12.3. HPLC conditions: The enantiomeric excess was determined by HPLC (Chiralcel OZ-H), Hex: *i*-PrOH 90:10, UV 210 nm, 0.8 ml/min, syn:  $t_{\text{R}} = 40.98$  min (major) and  $t_{\text{R}} = 35.47$  min (minor). HRMS (ESI-TOF) Calcd. For  $\text{C}_{12}\text{H}_{15}\text{NO}_4$  [M-H] 236.0923, Found: 236.0938. IR( $\text{v}/\text{cm}^{-1}$ ): 2970, 2939, 2888, 2839, 2729, 1724, 1601, 1552, 1491, 1456, 1382, 1263, 1161, 1045, 785, 702.

**(2R,3S)-3-(2-methoxyphenyl)-2-methyl-4-nitrobutanal (6bh)<sup>2b</sup>**

Pale yellow oil.  $^1\text{H}$  NMR (400 MHz,  $\text{CDCl}_3$ )  $\delta$  9.71 (d,  $J = 1.8$  Hz, 1H), 7.31 – 7.23 (m, 1H), 7.07 (dd,  $J = 7.5, 1.7$  Hz, 1H), 6.96 – 6.83 (m, 2H), 4.90 – 4.81 (m, 1H), 4.77 – 4.70 (m, 1H), 4.10 – 3.96 (m, 1H), 3.83 (s, 3H), 3.09 – 2.91 (m, 1H), 0.93 (d,  $J = 7.3$  Hz, 3H). HPLC conditions: The enantiomeric excess was determined by HPLC (Chiralcel AS-H), Hex: *i*-PrOH 98:2, UV 210 nm, 0.95 ml/min, syn:  $t_{\text{R}} = 45.50$  min (major) and  $t_{\text{R}} = 43.61$  min (minor).

**(2R,3S)-2-methyl-4-nitro-3-*o*-tolylbutanal (6bi)<sup>3c</sup>**

Pale yellow oil.  $^1\text{H}$  NMR (400 MHz,  $\text{CDCl}_3$ ):  $\delta$  9.72 (d,  $J = 2.0$  Hz, 1H), 7.23 – 7.08 (m, 4H), 4.83 – 4.61 (m, 2H), 4.22 – 4.03 (m, 1H), 2.82 – 2.71 (m, 1H), 2.38 (s, 3H), 0.96 (d,  $J = 7.3$  Hz, 3H). HPLC conditions: The enantiomeric excess was determined by HPLC (Chiralcel AS-H), Hex: *i*-PrOH 95:5, UV 210 nm, 0.9 ml/min, syn:  $t_{\text{R}} = 23.11$  min (major) and  $t_{\text{R}} = 24.89$  min (minor).

**(2R,3S)-3-(3,4-dimethoxyphenyl)-2-methyl-4-nitrobutanal (6bj)**

Pale yellow oil.  $^1\text{H}$  NMR (400 MHz,  $\text{CDCl}_3$ ):  $\delta$  9.70 (d,  $J = 1.9$  Hz, 1H), 6.86 – 6.62 (m, 3H), 4.84 – 4.72 (m, 1H), 4.69 – 4.61 (m, 1H), 3.86 (s, 3H), 3.85 (s, 3H), 3.79 – 3.70 (m, 1H), 2.82 – 2.68 (m, 1H), 1.02 (d,  $J = 7.2$  Hz, 3H).  $^{13}\text{C}$  NMR (100 MHz,  $\text{CDCl}_3$ )  $\delta$  202.6, 149.4, 148.9, 129.0, 120.3, 111.6, 111.3, 78.5, 56.1, 56.0, 48.8, 43.9, 12.3. HPLC conditions: The enantiomeric excess was determined by HPLC (Chiralcel OJ-H), Hex: *i*-PrOH 75:25, UV 210 nm, 0.6 ml/min, syn:  $t_{\text{R}} = 80.56$  min (major) and  $t_{\text{R}} = 122.64$  min (minor). HRMS (ESI-TOF) Calcd. For  $\text{C}_{13}\text{H}_{17}\text{NO}_5$  [M-H] 266.1028, Found: 266.1040. IR( $\text{v}/\text{cm}^{-1}$ ): 2968, 2937, 2888, 2839, 1722, 1592, 1552, 1518, 1463, 1381, 1263, 1145, 1026, 980, 901, 810, 768.

**(2R,3S)-2-methyl-3-(naphthalen-1-yl)-4-nitrobutanal (6bk)<sup>2b</sup>**

Pale yellow oil.  $^1\text{H}$  NMR (400 MHz,  $\text{CDCl}_3$ ):  $\delta$  9.76 (d,  $J = 1.8$  Hz, 1H), 8.24 – 8.05 (m, 1H), 7.89 (d,  $J = 8.0$  Hz, 1H), 7.81 (d,  $J = 8.2$  Hz, 1H), 7.63 – 7.33 (m, 4H), 5.00 – 4.82 (m, 3H), 3.10 – 2.92 (m, 1H), 0.99 (d,  $J = 7.3$  Hz, 3H). HPLC conditions: The enantiomeric excess was determined by HPLC (Chiralcel AS-H), Hex: *i*-PrOH 90:10, UV 210 nm, 0.8 ml/min, syn:  $t_{\text{R}} = 37.14$  min (major) and  $t_{\text{R}} = 39.39$  min (minor).

**(2R,3S)-2-methyl-3-(naphthalen-2-yl)-4-nitrobutanal (6bl)<sup>3a</sup>**

Pale yellow oil.  $^1\text{H}$  NMR (400 MHz,  $\text{CDCl}_3$ ):  $\delta$  9.75 (d,  $J = 1.6$  Hz, 1H), 7.86 – 7.78 (m, 3H), 7.68 – 7.61 (m, 1H), 7.53 – 7.45 (m, 2H), 7.35 – 7.24 (m, 1H), 4.91 – 4.84 (m, 1H), 4.82 – 4.73 (m, 1H), 4.04 – 3.92 (m, 1H), 2.93 – 2.82 (m, 1H), 1.02 (d,  $J = 7.3$  Hz, 3H). HPLC conditions: The enantiomeric excess was determined by HPLC (Chiralcel AS-H), Hex: *i*-PrOH 90:10, UV 210 nm, 0.8 ml/min, syn:  $t_{\text{R}} = 34.53$  min (major) and  $t_{\text{R}} = 41.53$  min (minor).

**(2*R*,3*R*)-3-(furan-2-yl)-2-methyl-4-nitrobutanal (6bm)<sup>2b</sup>**

Pale yellow oil.  $^1\text{H}$  NMR (400 MHz,  $\text{CDCl}_3$ ):  $\delta$  9.70 (d,  $J = 1.0$  Hz, 1H), 7.44 – 7.30 (m, 1H), 6.32 – 6.28 (m, 1H), 6.21 – 6.16 (m, 1H), 4.78 – 4.66 (m, 2H), 4.13 – 4.03 (m, 1H), 2.87–2.75 (m, 1H), 1.06 (d,  $J = 7.3$  Hz, 3H). HPLC conditions: The enantiomeric excess was determined by HPLC (Chiralcel AS-H), Hex: *i*-PrOH 90:10, UV 210 nm, 0.8 ml/min, syn:  $t_{\text{R}} = 24.77$  min (major) and  $t_{\text{R}} = 22.84$  min (minor).

**(2*R*,3*R*)-2-methyl-4-nitro-3-(thiophen-2-yl)butanal (6bn)<sup>2b</sup>**

Pale yellow oil.  $^1\text{H}$  NMR (400 MHz,  $\text{CDCl}_3$ ):  $\delta$  9.68 (d,  $J = 1.2$  Hz, 1H), 7.25 – 7.21 (m, 1H), 6.97 – 6.87 (m, 2H), 4.83 – 4.64 (m, 2H), 4.27 – 4.12 (m, 1H), 2.90 – 2.68 (m, 1H), 1.12 (d,  $J = 7.3$  Hz, 3H). HPLC conditions: The enantiomeric excess was determined by HPLC (Chiralcel OZ-H), Hex: *i*-PrOH 98:2, UV 230 nm, 0.95 ml/min, syn:  $t_{\text{R}} = 84.95$  min (major) and  $t_{\text{R}} = 57.26$  min (minor).

**(2*R*,3*S*)-2-methyl-4-nitro-3-(pyridin-3-yl)butanal (6bo)**



Pale yellow oil.  $^1\text{H}$  NMR (400 MHz,  $\text{CDCl}_3$ ):  $\delta$  9.68 (d,  $J = 1.4$  Hz, 1H), 8.56 – 8.45 (m, 2H), 7.54 – 7.50 (m, 1H), 7.33 – 7.22 (m, 1H), 4.84 – 4.79 (m, 1H), 4.73 – 4.65 (m, 1H), 3.90 – 3.80 (m, 1H), 2.91 – 2.77 (m, 1H), 1.01 (d,  $J = 7.4$  Hz, 3H).  $^{13}\text{C}$  NMR (100 MHz,  $\text{CDCl}_3$ )  $\delta$  201.7, 149.9, 149.7, 135.7, 132.8, 124.0, 77.6, 48.1, 41.7, 12.4. HPLC conditions: The enantiomeric excess was determined by HPLC (Chiralcel OZ-H), Hex: *i*-PrOH 75:25, UV 210 nm, 0.6 ml/min, syn:  $t_{\text{R}} = 49.58$  min (major) and  $t_{\text{R}} = 61.62$  min (minor). HRMS (ESI-TOF) Calcd. For  $\text{C}_{10}\text{H}_{12}\text{N}_2\text{O}_3$  [M+H] 209.0926, Found: 209.0925. IR( $\text{v}/\text{cm}^{-1}$ ): 3035, 2974, 2935, 2881, 2854, 2730, 1724, 1576, 1556, 1381, 1025, 814, 717.

**(2R,3S)-3-(4-chlorophenyl)-2-isopropyl-4-nitrobutanal (6cb)**

White solid (melting point: 78.2-80.0°C).  $^1\text{H}$  NMR (400 MHz,  $\text{CDCl}_3$ ):  $\delta$  9.90 (d,  $J = 2.2$  Hz, 1H), 7.36 – 7.27 (m, 2H), 7.16 – 7.08 (m, 2H), 4.71 – 4.62 (m, 1H), 4.58 – 4.47 (m, 1H), 3.92 – 3.83 (m, 1H), 2.78 – 2.70 (m, 1H), 1.76 – 1.64 (m, 1H), 1.10 (d,  $J = 7.2$  Hz, 3H), 0.86 (d,  $J = 7.0$  Hz, 3H).  $^{13}\text{C}$  NMR (100 MHz,  $\text{CDCl}_3$ )  $\delta$  204.2, 135.8, 134.2, 129.6, 129.5, 78.9, 58.7, 41.5, 28.1, 21.8, 17.1. HPLC conditions: The enantiomeric excess was determined by HPLC (Chiralcel OJ-H), Hex: *i*-PrOH 85:15, UV 210 nm, 0.7 ml/min, syn :  $t_{\text{R}} = 28.95$  min (major) and  $t_{\text{R}} = 26.76$  min (minor). HRMS (ESI-TOF) Calcd. For  $\text{C}_{13}\text{H}_{16}\text{ClNO}_3$  [M-H] 268.0740, Found: 268.0728. IR( $\text{v}/\text{cm}^{-1}$ ): 3029, 2964, 2934, 2875, 2845, 2742, 1716, 1554, 1492, 1468, 1379, 1087, 1013, 831, 721.

**(2R,3S)-2-isopropyl-3-(2-methoxyphenyl)-4-nitrobutanal (6cc)**

Pale yellow oil.  $^1\text{H}$  NMR (400 MHz,  $\text{CDCl}_3$ ):  $\delta$  9.91 (d,  $J = 2.4$  Hz, 1H), 7.30 – 7.23 (m, 1H), 7.11 (dd,  $J = 7.4, 1.7$  Hz, 1H), 6.94 – 6.83 (m, 2H), 4.83 – 4.75 (m, 1H), 4.61 – 4.54 (m, 1H), 4.17 – 4.07 (m, 1H), 3.85 (s, 3H), 3.08 – 3.02 (m, 1H), 1.74 – 1.63 (m, 1H), 1.10 (d,  $J = 7.2$  Hz, 3H), 0.84 (d,  $J = 7.0$  Hz, 3H).  $^{13}\text{C}$  NMR (100 MHz,  $\text{CDCl}_3$ )  $\delta$  205.1, 157.7, 130.9, 129.4, 124.8, 121.2, 111.4, 77.5, 57.1, 55.5, 39.4, 28.4, 21.9, 17.3. HPLC conditions: The enantiomeric excess was determined by HPLC (Chiralcel OJ-H), Hex: *i*-PrOH 96:4, UV 210 nm, 0.8 ml/min, syn :  $t_{\text{R}} = 37.63$  min (major) and  $t_{\text{R}} = 31.79$  min (minor). HRMS (ESI-TOF) Calcd. For  $\text{C}_{14}\text{H}_{19}\text{NO}_4$  [M-H] 264.1236, Found: 264.1221. IR( $\text{v}/\text{cm}^{-1}$ ): 2964, 2942, 2875, 2840, 2741, 1716, 1601, 1587, 1552, 1494, 1464, 1381, 1246, 1124, 1026, 756.

## References

- [1] X. F. Xia, X. Z. Shu, K. G. Ji, Y. F. Yang, A. Shaukat, X. Y. Liu and Y. M. Liang, *J. Org. Chem.*, 2010, **75**, 2893-2902.
- [2] (a) J. Xiao, F. X. Xu, Y. P. Lu and T. P. Loh, *Org. Lett.*, 2010, **12**, 1220-1223; (b) R.-S. Luo, J. Weng, H.-B. Ai, G. Lu, A. S. C. Chan, *Adv. Synth. Catal.* 2009, **351**, 2449-2459.
- [3] (a) R. Y. Yang, C. S. Da, L. Yi, F. C. Wu and H. Li, *Lett. Org. Chem.*, 2009, **6**, 44-49; (b) R. Husmann, M. Jörres, G. Raabe and C. Bolm, *Chem. Eur. J.*, 2010, **16**, 12549-12552; (c) W.-H. Wang, X.-B. Wang, K. Kodama, T. Hirose and G.-Y. Zhang, *Tetrahedron*, 2010, **66**, 4970-4976; (d) K. Patora-Komisarska, M. Benohoud, H. Ishikawa, D. Seebach and Y. Hayashi, *Helv Chim Acta*, 2011, **94**, 719-745.

#### 4. HPLC Spectra

**Figure 1.** Racemic product of (*E*)-(2-nitrovinyl)benzene with butyraldehyde: Using a Chiral OD-H column, Hex: *i*-PrOH 91:9, UV 230 nm, 0.9ml/min, syn:  $t_R$ = 32.96 min (major) and  $t_R$ = 24.73 min (minor).

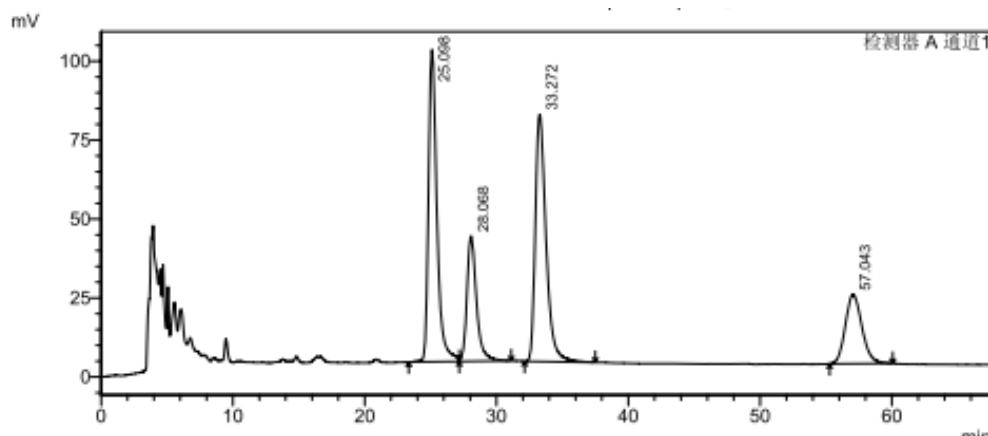

| Peak | Retention Time/min | Area % |
|------|--------------------|--------|
| 1    | 25.098             | 34.507 |
| 2    | 28.068             | 15.689 |
| 3    | 33.272             | 34.727 |
| 4    | 57.043             | 15.076 |

**Figure 2.** Enantioselective product of (*E*)-(2-nitrovinyl)benzene with butyraldehyde.

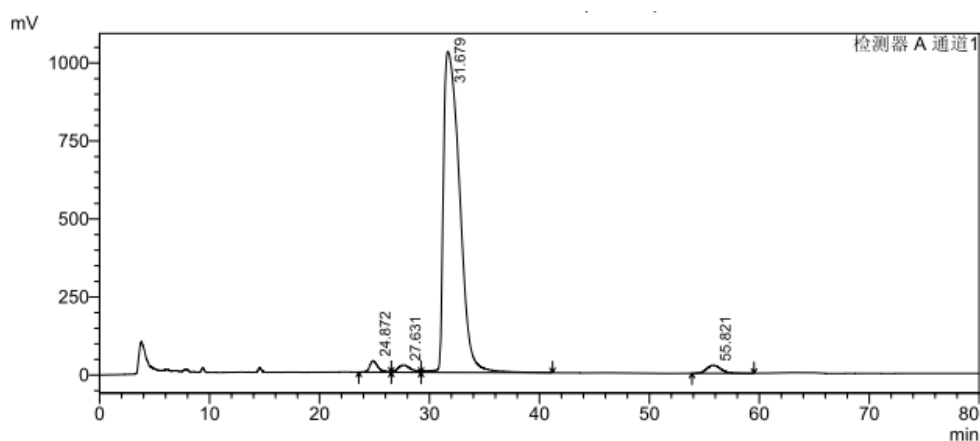

| Peak | Retention Time/min | Area % |
|------|--------------------|--------|
| 1    | 24.872             | 1.691  |
| 2    | 27.631             | 1.655  |
| 3    | 31.679             | 94.578 |
| 4    | 55.821             | 2.007  |

**Figure 3.** Racemic product of (*E*)-(2-nitrovinyl)benzene with propyl aldehyde: using Chiral OD-H column, Hex: *i*-PrOH 90:10, UV 210 nm, 0.8ml/min.

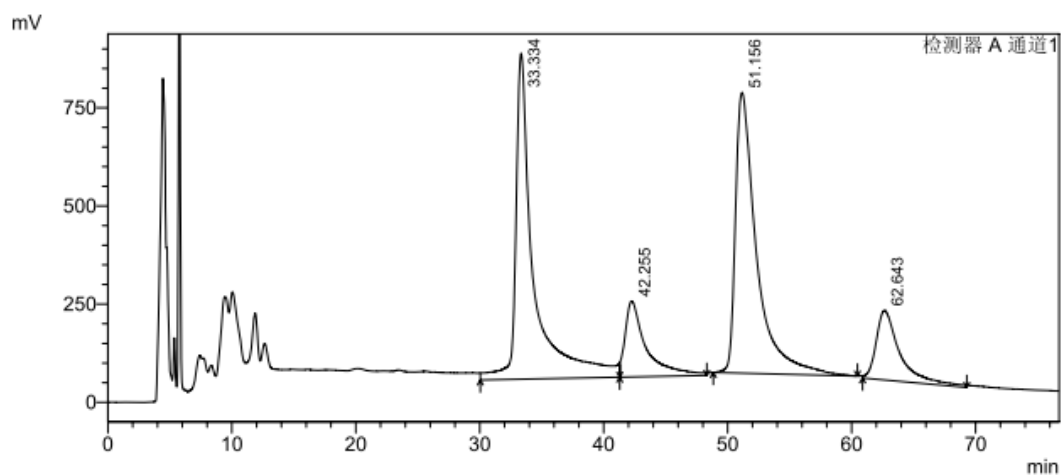

| Peak | Retention Time/min | Area % |
|------|--------------------|--------|
| 1    | 33.334             | 38.818 |
| 2    | 42.255             | 10.687 |
| 3    | 51.156             | 39.536 |
| 4    | 62.643             | 10.959 |

**Figure 4.** Enantioselective product of (*E*)-(2-nitrovinyl)benzene with propionaldehyde

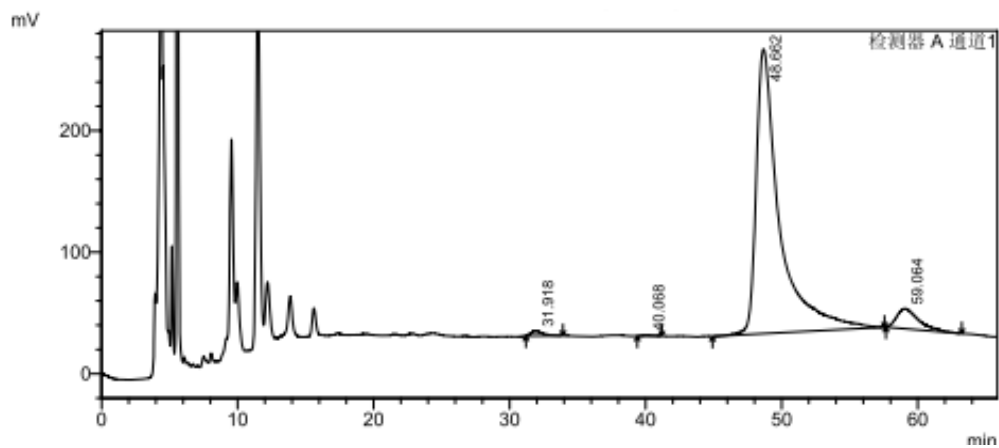

| Peak | Retention Time/min | Area % |
|------|--------------------|--------|
| 1    | 31.918             | 0.815  |
| 2    | 40.068             | 0.173  |
| 3    | 48.662             | 92.822 |
| 4    | 59.064             | 6.189  |

**Figure 5.** Racemic product of (*E*)-(2-nitrovinyl)benzene with isovaleraldehyde: Using Chiral OD-H column, Hex: *i*-PrOH 95:5, UV 210 nm, 0.8ml/min, syn:  $t_R$ = 27.20 min (major) and  $t_R$ = 25.67 min (minor).

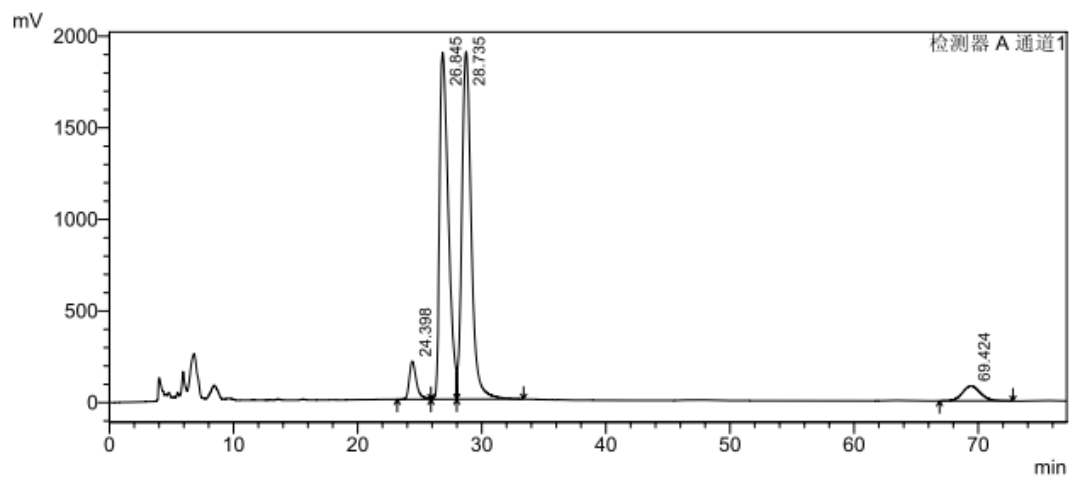

| Peak | Retention Time/min | Area % |
|------|--------------------|--------|
| 1    | 24.398             | 5.420  |
| 2    | 26.845             | 44.491 |
| 3    | 28.735             | 44.633 |
| 4    | 69.424             | 5.456  |

**Figure 6.** Enantioselective product of (*E*)-(2-nitrovinyl)benzene with isovaleraldehyde

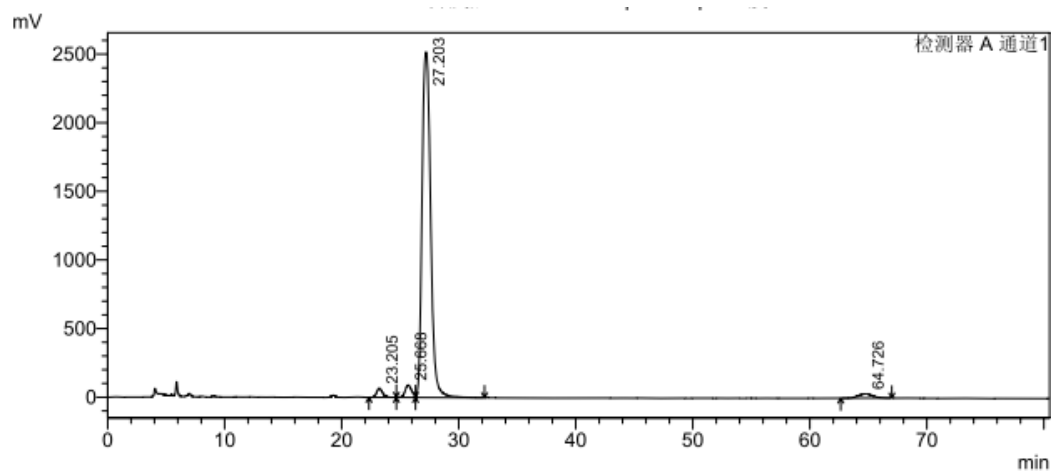

| Peak | Retention Time/min | Area % |
|------|--------------------|--------|
| 1    | 23.205             | 1.676  |
| 2    | 25.668             | 2.609  |
| 3    | 27.203             | 93.732 |
| 4    | 64.726             | 1.983  |

**Figure 7.** Racemic product of (*E*)-(2-nitrovinyl)benzene and *n*-hexyl aldehyde: Using Chiral OD-H column, Hex: *i*-PrOH 90:10, UV 210 nm, 0.8 ml/min.

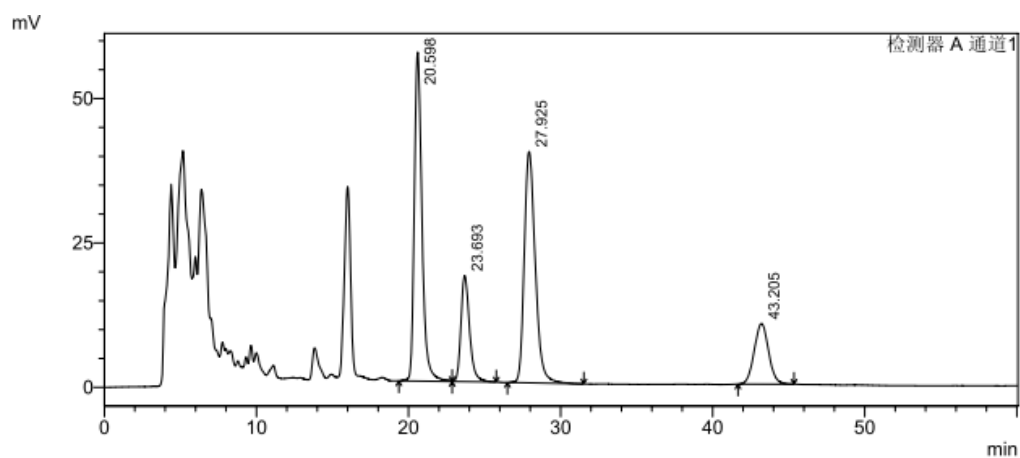

| Peak | Retention Time/min | Area % |
|------|--------------------|--------|
| 1    | 20.598             | 36.728 |
| 2    | 23.693             | 13.313 |
| 3    | 27.925             | 37.214 |
| 4    | 43.205             | 12.746 |

**Figure 8.** Enantioselective product of (*E*)-(2-nitrovinyl)benzene and *n*-hexyl aldehyde

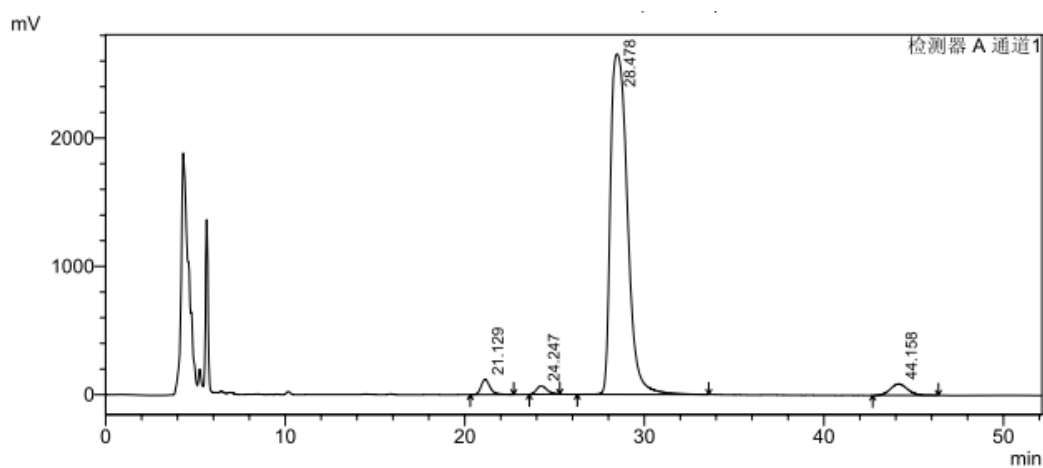

| Peak | Retention Time/min | Area % |
|------|--------------------|--------|
| 1    | 21.129             | 2.192  |
| 2    | 24.247             | 1.416  |
| 3    | 28.478             | 93.210 |
| 4    | 44.158             | 3.182  |

**Figure 9.** Racemic product of (*E*)-1-chloro-4-(2-nitrovinyl)benzene and propyl aldehyde: Chiral AD-H column, Hex: *i*-PrOH 97:3, UV 210 nm, 0.9 ml/min.

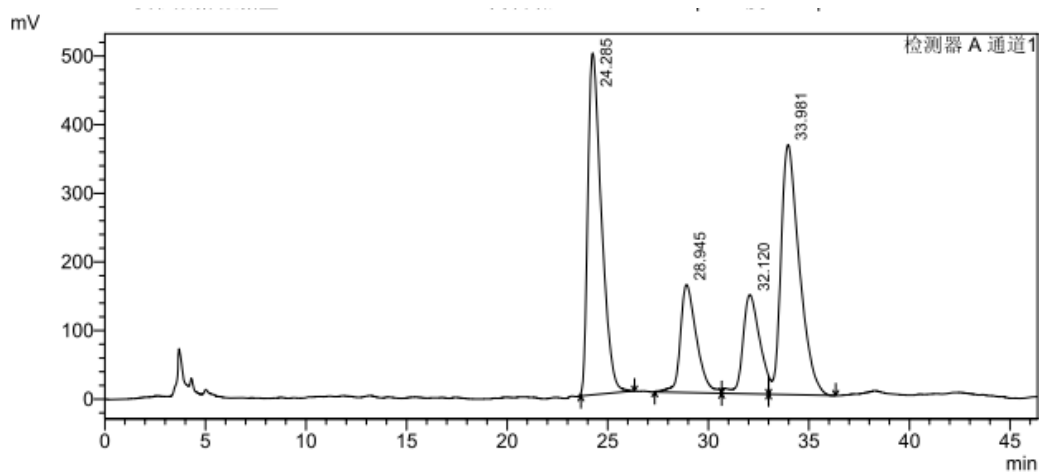

| Peak | Retention Time/min | Area % |
|------|--------------------|--------|
| 1    | 24.285             | 36.666 |
| 2    | 28.945             | 13.790 |
| 3    | 32.120             | 13.015 |
| 4    | 33.981             | 36.529 |

**Figure 10.** Enantioselective product of (*E*)-1-chloro-4-(2-nitrovinyl)benzene and propyl aldehyde.

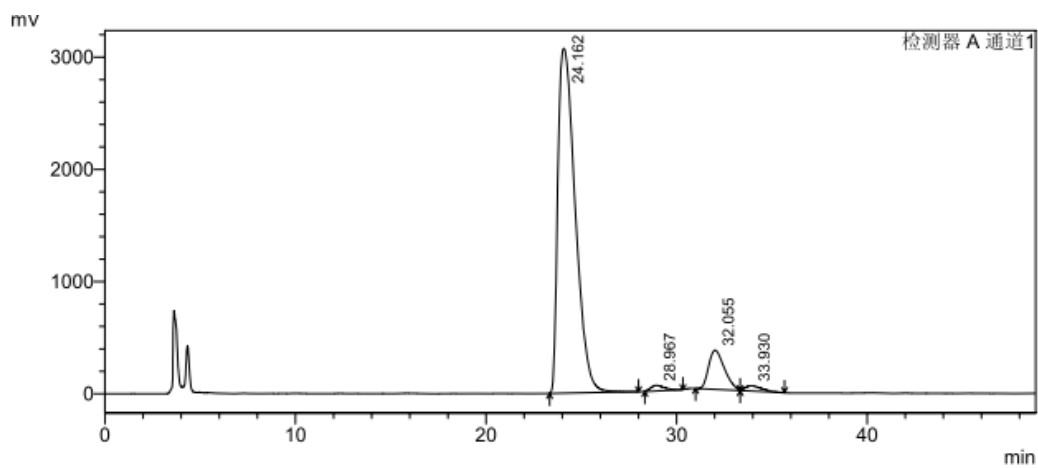

| Peak | Retention Time/min | Area % |
|------|--------------------|--------|
| 1    | 24.162             | 88.407 |
| 2    | 28.967             | 1.161  |
| 3    | 32.055             | 9.140  |
| 4    | 33.930             | 1.291  |

**Figure 11.** Racemic product of (*E*)-1-chloro-3-(2-nitrovinyl)benzene and propyl aldehyde: Chiral OZ-H column, Hex: *i*-PrOH 90:10, UV 210 nm, 0.8 ml/min.

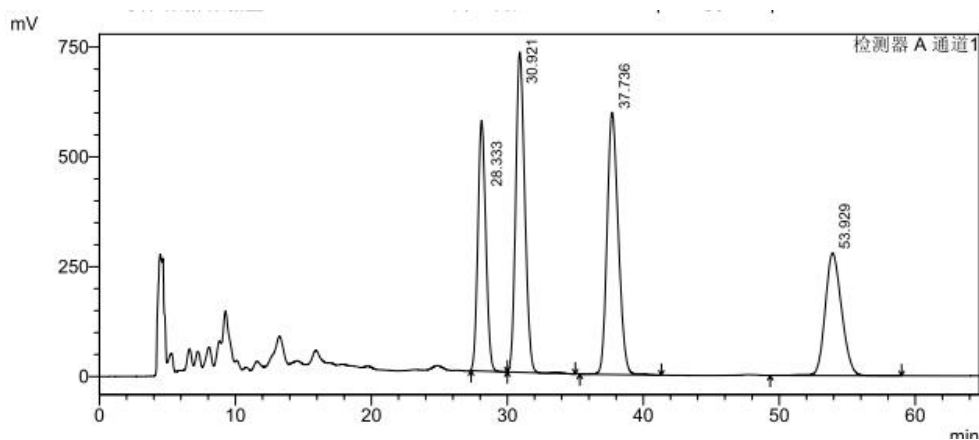

| Peak | Retention Time/min | Area % |
|------|--------------------|--------|
| 1    | 28.333             | 20.165 |
| 2    | 30.921             | 29.603 |
| 3    | 37.736             | 29.877 |
| 4    | 53.929             | 20.356 |

**Figure 12.** Enantioselective product of (*E*)-1-chloro-3-(2-nitrovinyl)benzene and propyl aldehyde.

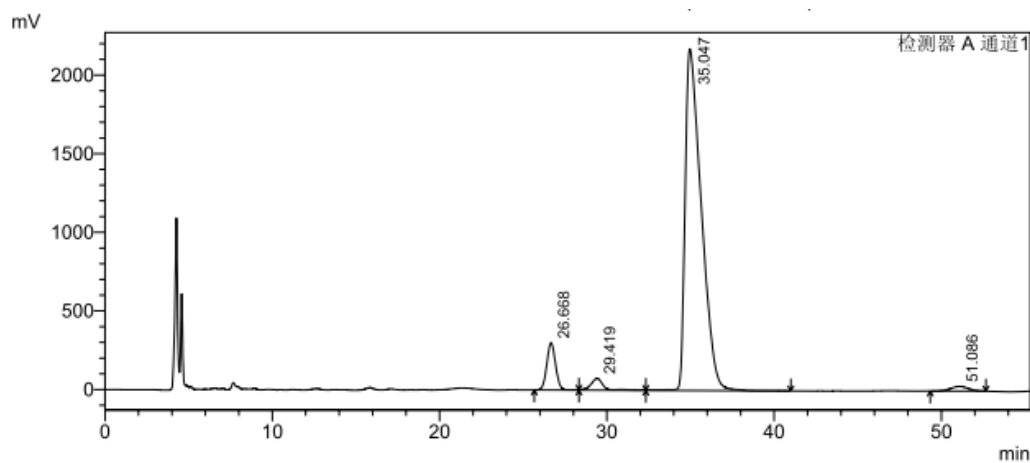

| Peak | Retention Time/min | Area % |
|------|--------------------|--------|
| 1    | 26.668             | 6.775  |
| 2    | 29.419             | 2.392  |
| 3    | 35.047             | 89.544 |
| 4    | 51.086             | 1.289  |



**Figure 13.** Racemic product of (*E*)-1-fluoro-4-(2-nitrovinyl)benzene and propyl aldehyde: Using Chiral AD-H column, Hex: *i*-PrOH 97:3, UV 210 nm, 0.9 ml/min.

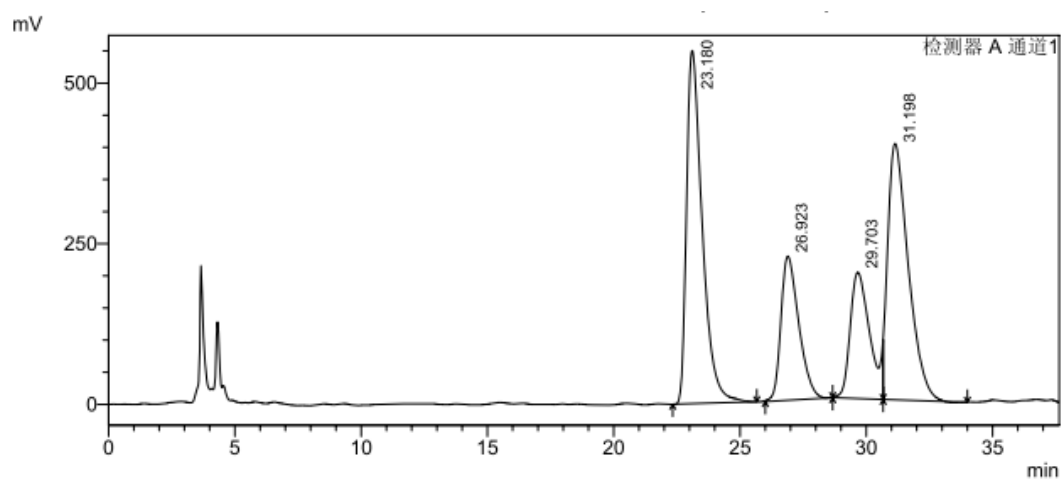

| Peak | Retention Time/min | Area % |
|------|--------------------|--------|
| 1    | 23.180             | 34.926 |
| 2    | 26.923             | 16.232 |
| 3    | 29.703             | 15.731 |
| 4    | 31.198             | 33.112 |

**Figure 14.** Enantioselective product of (*E*)-1-fluoro-4-(2-nitrovinyl)benzene and propyl aldehyde.

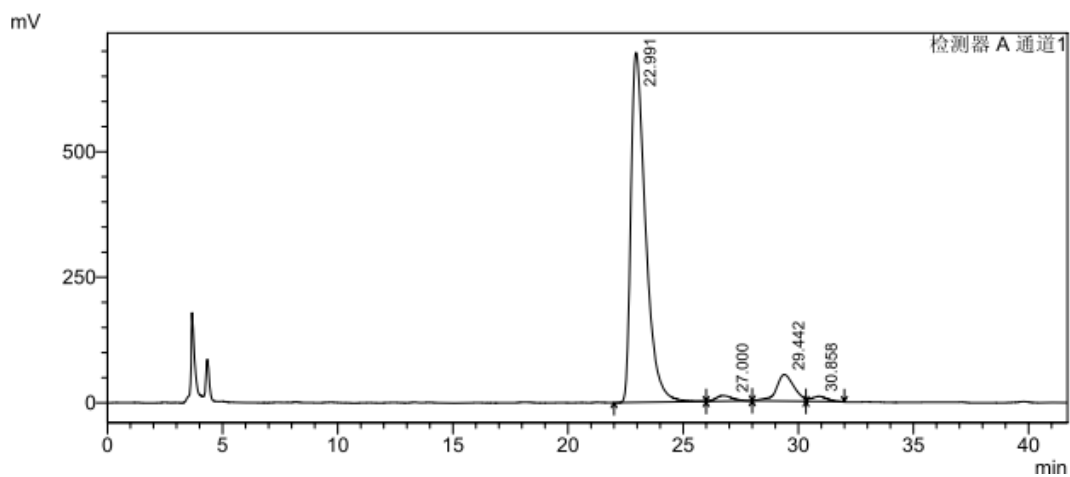

| Peak | Retention Time/min | Area % |
|------|--------------------|--------|
| 1    | 22.991             | 88.959 |
| 2    | 27.000             | 1.566  |
| 3    | 29.442             | 8.101  |
| 4    | 30.858             | 1.374  |

**Figure 15.** Racemic product of (*E*)-1-(2-nitrovinyl)-4-(trifluoromethyl)benzene and propyl aldehyde: Chiral AD-H column, Hex: *i*-PrOH 90:10, UV 210 nm, 0.8 ml/min.

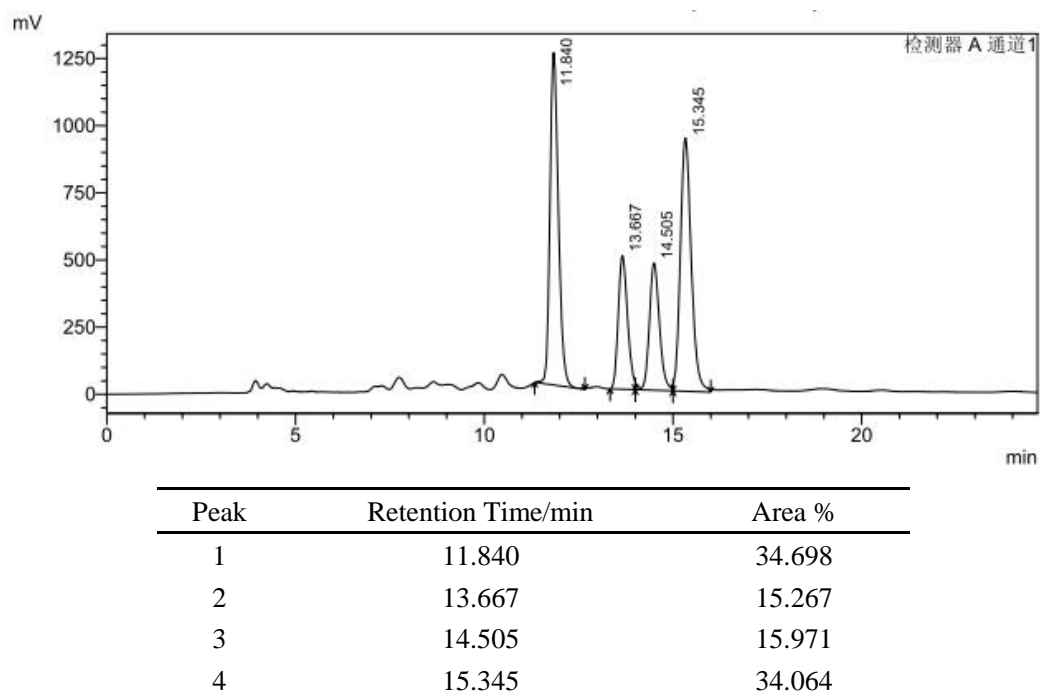

**Figure 16.** Enantioselective product of (*E*)-1-(2-nitrovinyl)-4-(trifluoromethyl)benzene and propyl aldehyde.

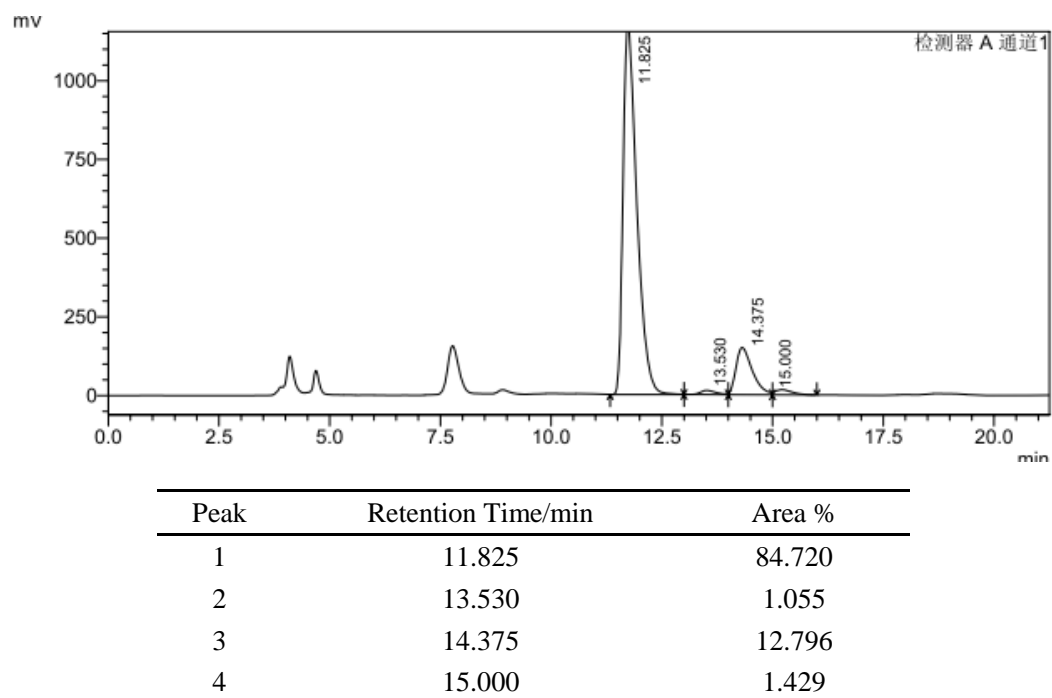

**Figure 17.** Racemic product of (*E*)-1-methoxy-4-(2-nitrovinyl)benzene and propyl aldehyde:  
Using Chiral AS-H column, Hex: *i*-PrOH 85:15, UV 210 nm, 0.8 ml/min.

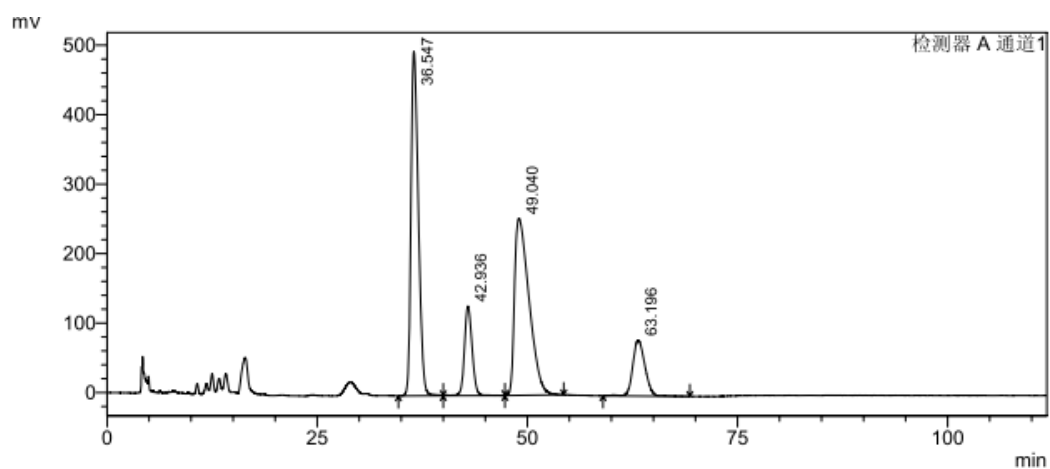

| Peak | Retention Time/min | Area % |
|------|--------------------|--------|
| 1    | 36.547             | 39.140 |
| 2    | 42.936             | 10.592 |
| 3    | 49.040             | 39.685 |
| 4    | 63.196             | 10.583 |

**Figure 18.** Enantioselective product of (*E*)-1-methoxy-4-(2-nitrovinyl)benzene and propyl aldehyde.

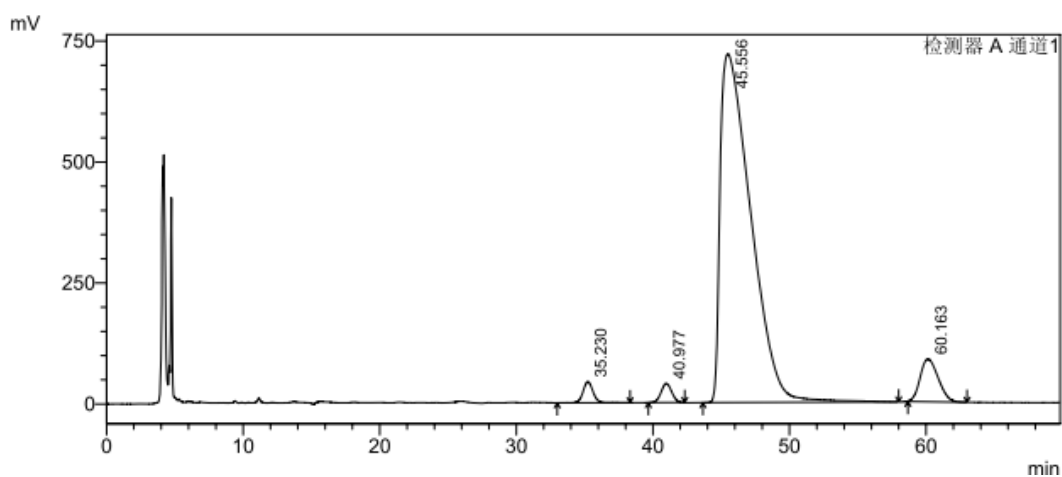

| Peak | Retention Time/min | Area % |
|------|--------------------|--------|
| 1    | 35.230             | 1.750  |
| 2    | 40.977             | 1.707  |
| 3    | 45.556             | 90.022 |
| 4    | 60.163             | 6.521  |

**Figure 19.** Racemic product of (*E*)-1-methoxy-3-(2-nitrovinyl)benzene and propyl aldehyde:  
Using Chiral OZ-H column, Hex: *i*-PrOH 90:10, UV 210 nm, 0.8 ml/min.

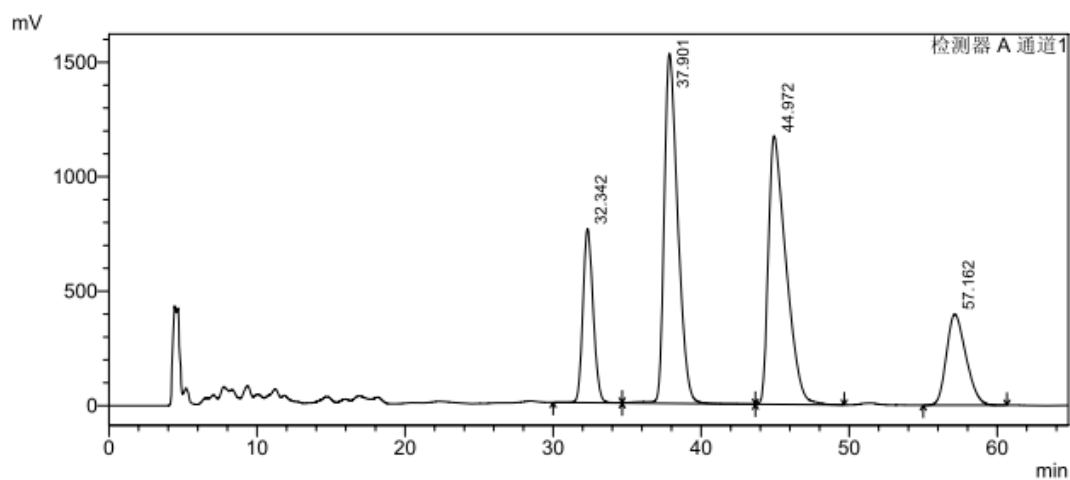

| Peak | Retention Time/min | Area % |
|------|--------------------|--------|
| 1    | 32.342             | 13.679 |
| 2    | 37.901             | 36.431 |
| 3    | 44.972             | 36.299 |
| 4    | 57.162             | 13.591 |

**Figure 20.** Enantioselective product of (*E*)-1-methoxy-3-(2-nitrovinyl)benzene and propyl aldehyde.

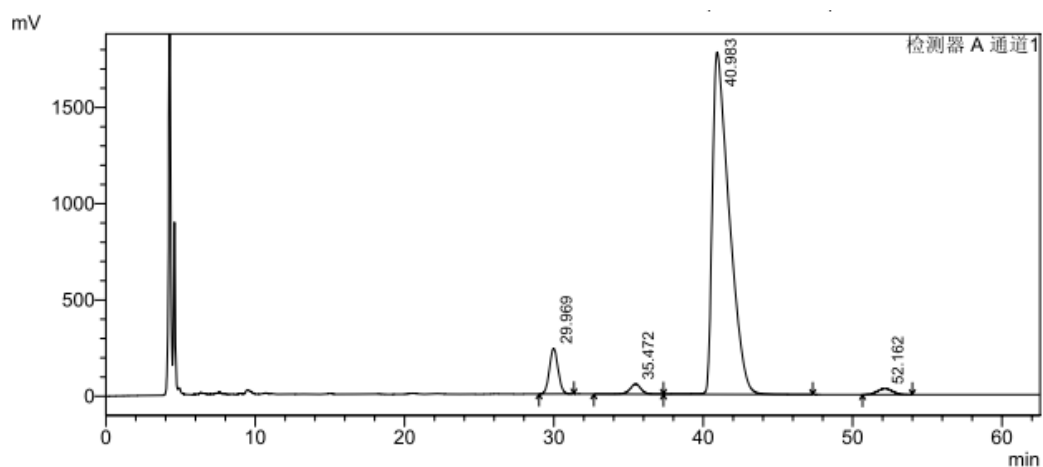

| Peak | Retention Time/min | Area % |
|------|--------------------|--------|
| 1    | 29.969             | 6.205  |
| 2    | 35.472             | 1.819  |
| 3    | 40.983             | 90.544 |
| 4    | 52.162             | 1.431  |

**Figure 21.** Racemic product of (*E*)-1-methoxy-2-(2-nitrovinyl)benzene and propyl aldehyde:  
Using Chiral AS-H column, Hex: *i*-PrOH 98:2, UV 210 nm, 0.95 ml/min.

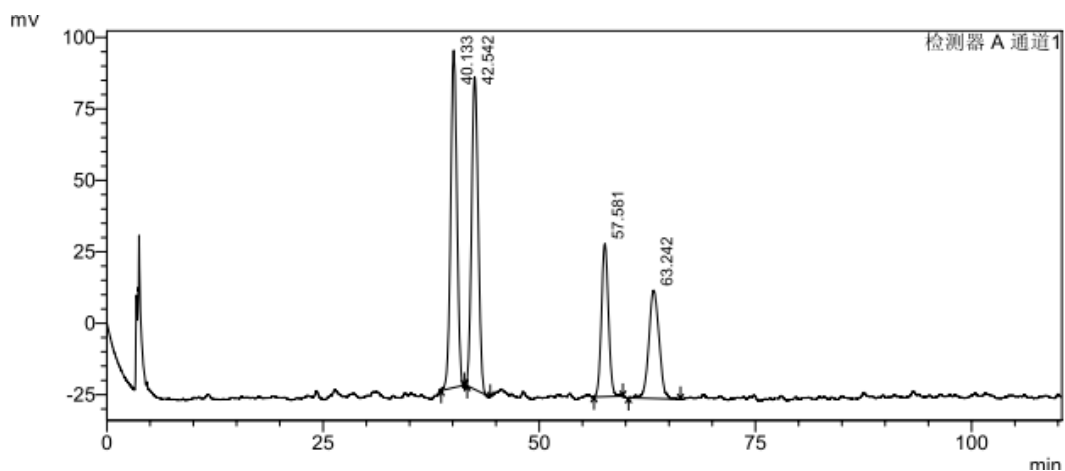

| Peak | Retention Time/min | Area % |
|------|--------------------|--------|
| 1    | 40.133             | 33.120 |
| 2    | 42.542             | 32.406 |
| 3    | 57.581             | 16.894 |
| 4    | 63.242             | 17.579 |

**Figure 22.** Enantioselective product of (*E*)-1-methoxy-2-(2-nitrovinyl)benzene and propyl aldehyde.

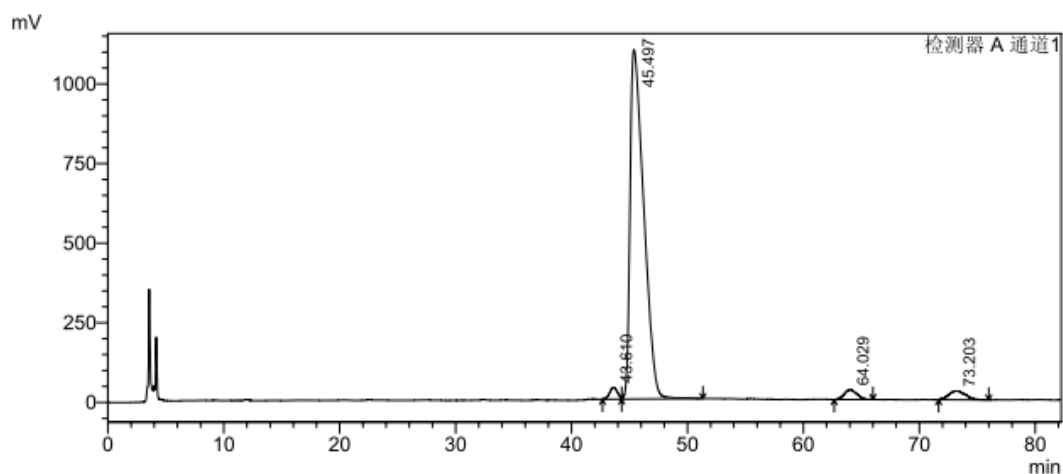

| Peak | Retention Time/min | Area % |
|------|--------------------|--------|
| 1    | 43.610             | 1.794  |
| 2    | 45.497             | 92.960 |
| 3    | 64.029             | 2.361  |
| 4    | 73.203             | 2.885  |

**Figure 23.** Racemic product of (*E*)-1-methyl-2-(2-nitrovinyl)benzene and propyl aldehyde: Using Chiral AS-H column, Hex: *i*-PrOH 95:5, UV 210 nm, 0.9 ml/min.

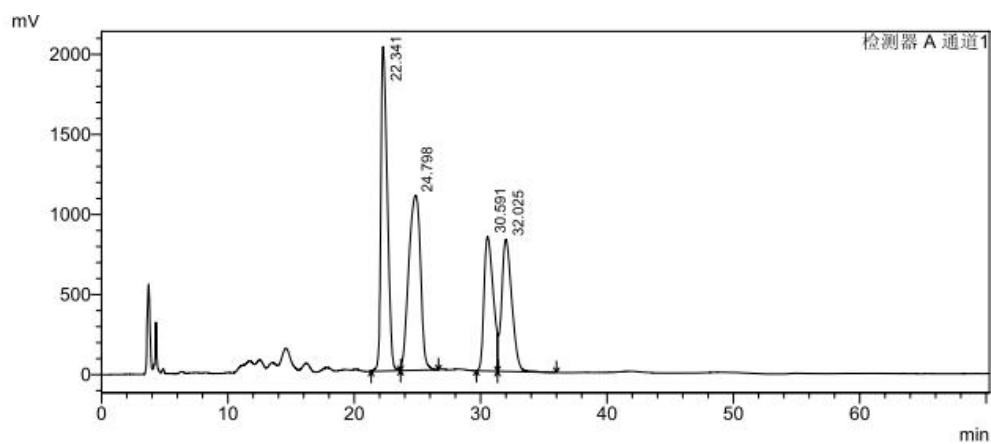

| Peak | Retention Time/min | Area % |
|------|--------------------|--------|
| 1    | 22.341             | 30.772 |
| 2    | 24.798             | 30.748 |
| 3    | 30.591             | 19.206 |
| 4    | 32.025             | 19.273 |

**Figure 24.** Enantioselective product of (*E*)-1-methyl-2-(2-nitrovinyl)benzene and propyl aldehyde.

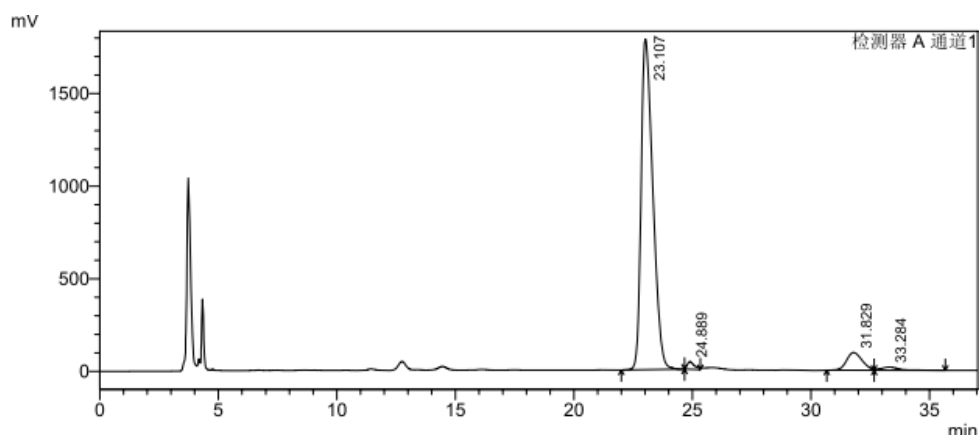

| Peak | Retention Time/min | Area % |
|------|--------------------|--------|
| 1    | 23.107             | 90.976 |
| 2    | 24.889             | 1.305  |
| 3    | 31.829             | 6.445  |
| 4    | 33.284             | 1.274  |

**Figure 25.** Racemic product of (*E*)-1,2-dimethoxy-4-(2-nitrovinyl)benzene and propyl aldehyde:  
Using Chiral OJ-H column, Hex: *i*-PrOH 75:25, UV 210 nm, 0.6 ml/min.

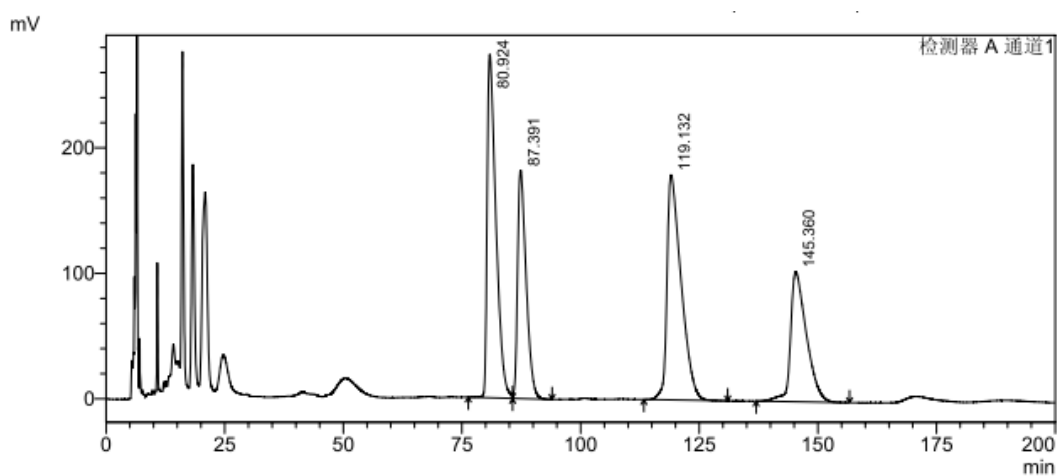

| Peak | Retention Time/min | Area % |
|------|--------------------|--------|
| 1    | 80.924             | 29.504 |
| 2    | 87.391             | 19.145 |
| 3    | 119.132            | 30.122 |
| 4    | 145.360            | 20.229 |

**Figure 26.** Enantioselective product of (*E*)-1,2-dimethoxy-4-(2-nitrovinyl)benzene and propyl aldehyde.

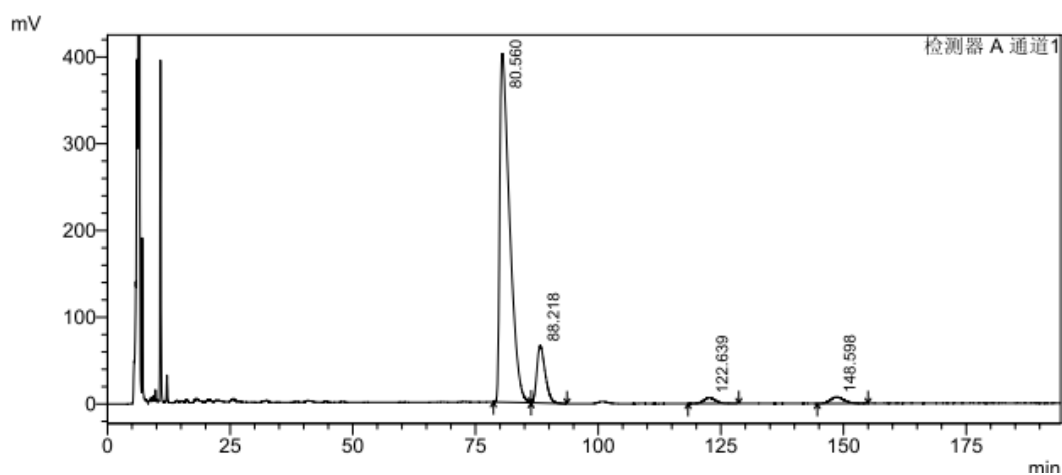

| Peak | Retention Time/min | Area % |
|------|--------------------|--------|
| 1    | 80.560             | 84.390 |
| 2    | 88.218             | 11.784 |
| 3    | 122.639            | 1.660  |
| 4    | 148.598            | 2.165  |

**Figure 27.** Racemic product of (*E*)-1-(2-nitrovinyl)naphthalene and propyl aldehyde: Using Chiral AS-H column, Hex: *i*-PrOH 90:10, UV 210 nm, 0.8 ml/min.

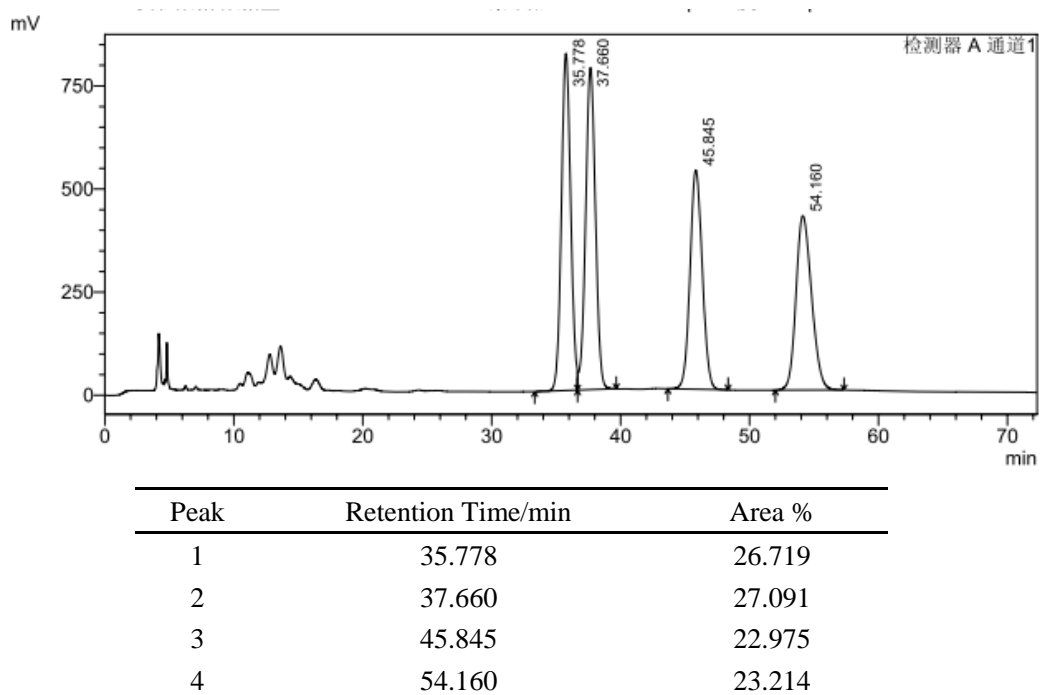

**Figure 28.** Enantioselective product of (*E*)-1-(2-nitrovinyl)naphthalene and propyl aldehyde.

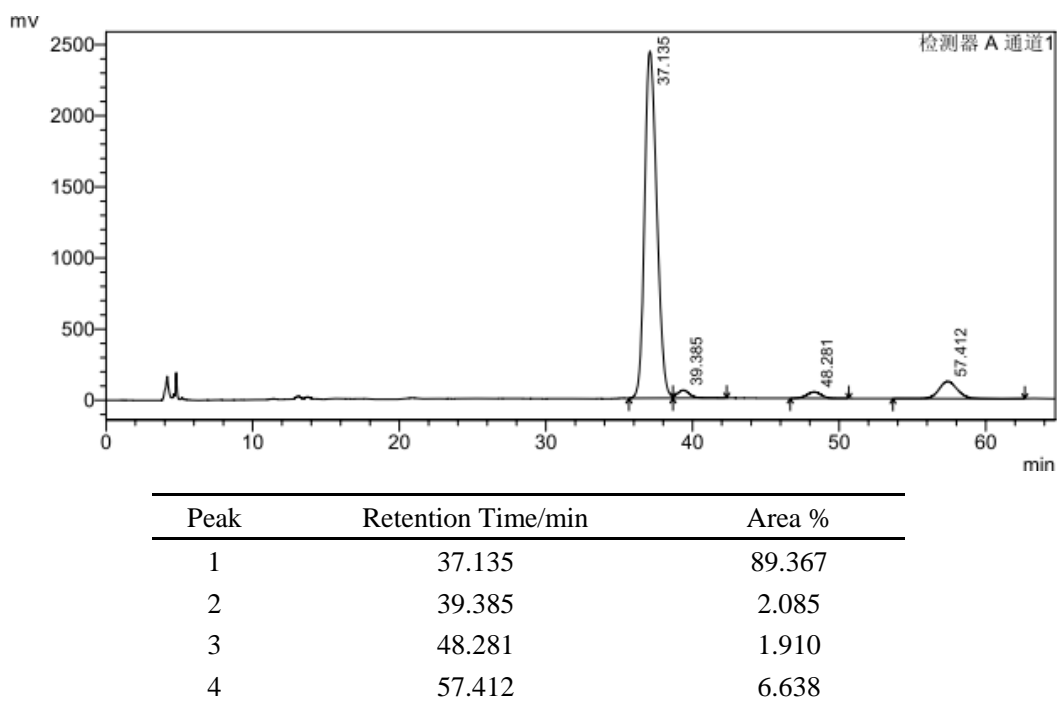



**Figure 29.** Racemic product of (*E*)-2-(2-nitrovinyl)naphthalene and propyl aldehyde: Using Chiral AS-H column, Hex: *i*-PrOH 90:10, UV 210 nm, 0.8 ml/min.

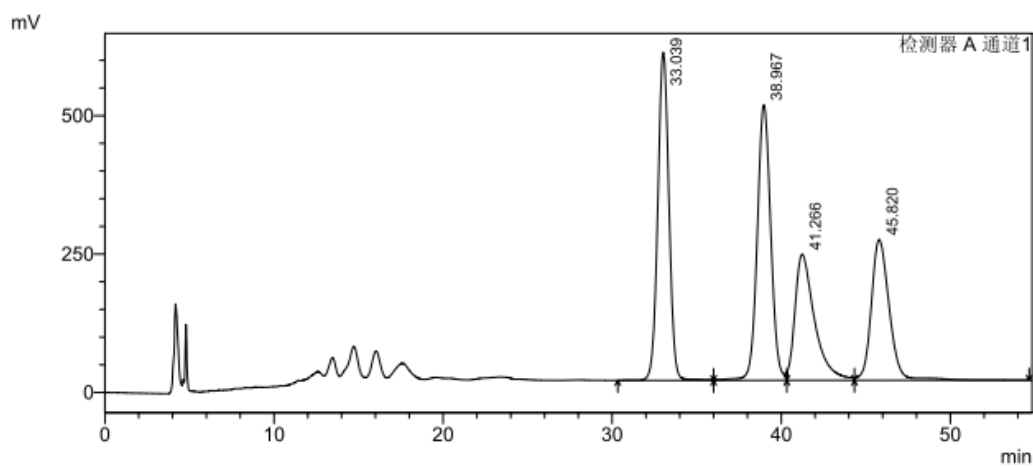

| Peak | Retention Time/min | Area % |
|------|--------------------|--------|
| 1    | 33.039             | 29.512 |
| 2    | 38.967             | 30.101 |
| 3    | 41.266             | 19.884 |
| 4    | 45.820             | 20.502 |

**Figure 30.** Enantioselective product of (*E*)-2-(2-nitrovinyl)naphthalene and propyl aldehyde.

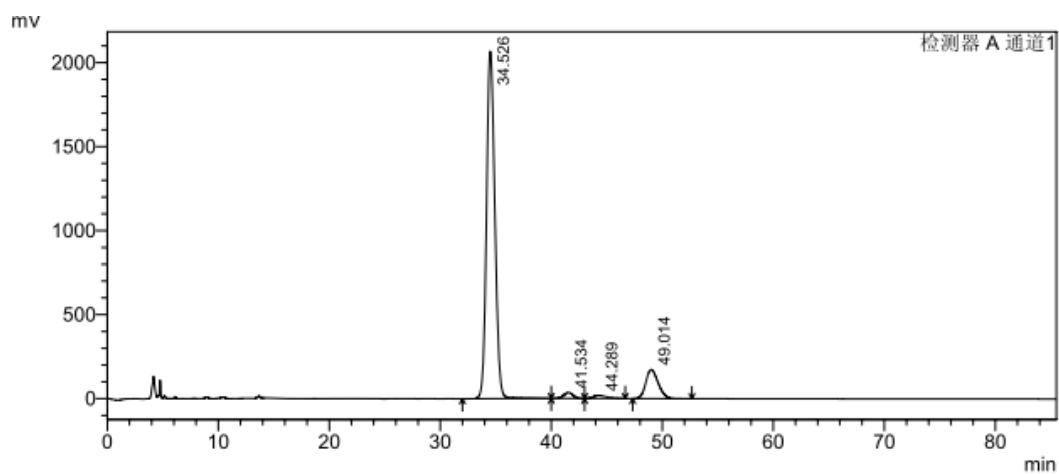

| Peak | Retention Time/min | Area % |
|------|--------------------|--------|
| 1    | 34.526             | 86.507 |
| 2    | 41.534             | 1.557  |
| 3    | 44.289             | 1.178  |
| 4    | 49.014             | 10.758 |

**Figure 31.** Racemic product of (*E*)-2-(2-nitrovinyl)furan and propyl aldehyde: Using Chiral AS-H column, Hex: *i*-PrOH 90:10, UV 210 nm, 0.8 ml/min.

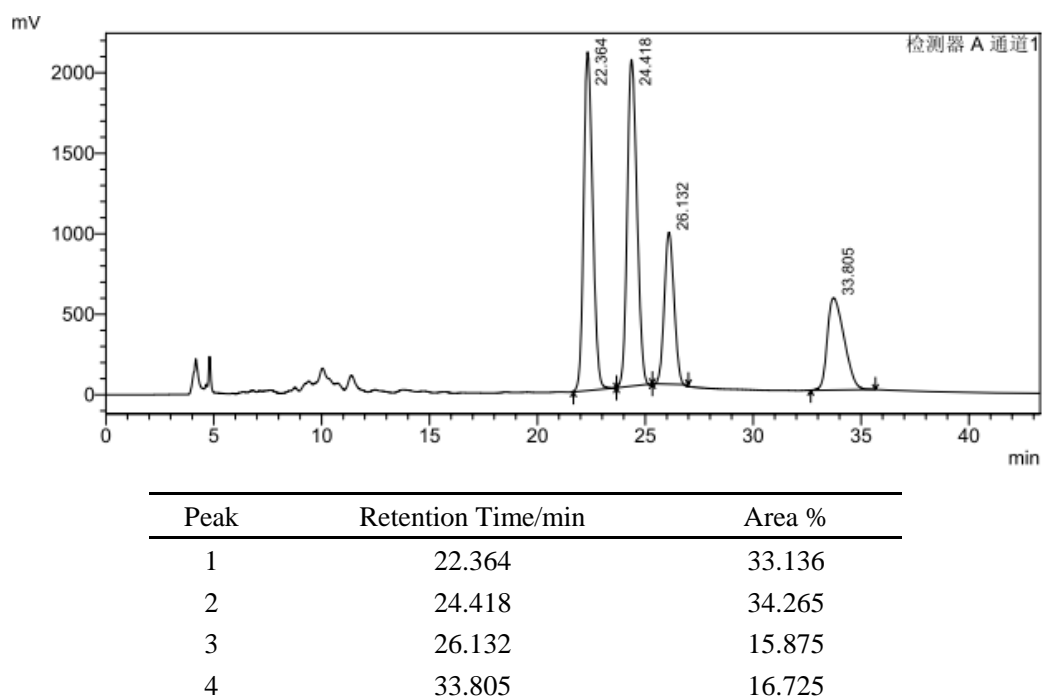

**Figure 32.** Enantioselective product of (*E*)-2-(2-nitrovinyl)furan and propyl aldehyde.

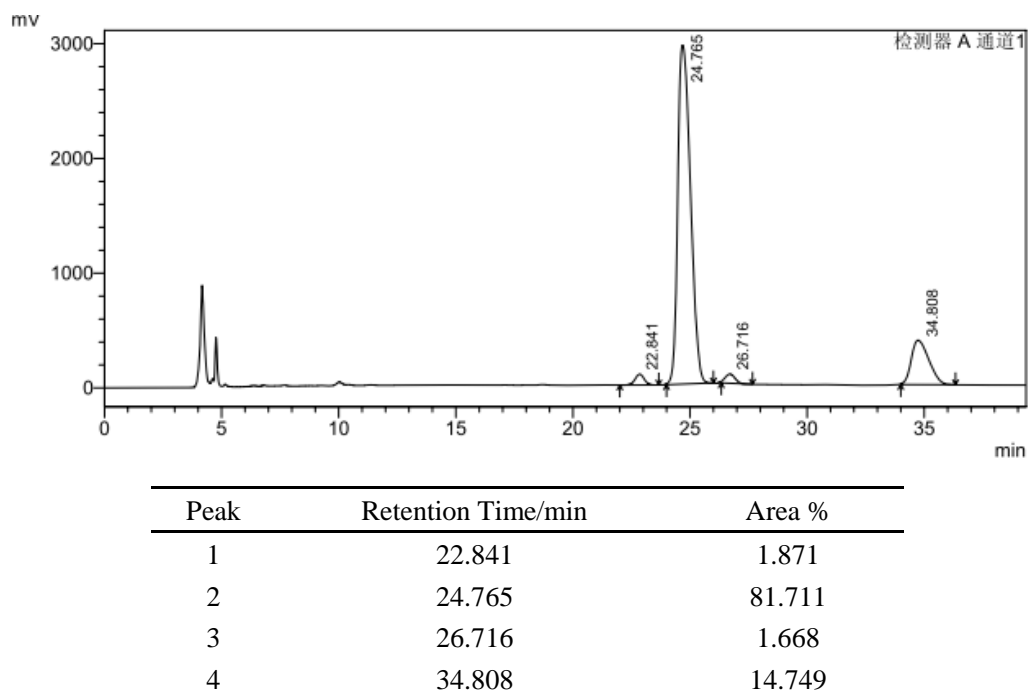

**Figure 33.** Racemic product of (*E*)-2-(2-nitrovinyl)thiophene and propyl aldehyde: Using Chiral OZ-H column, Hex: *i*-PrOH 98:2, UV 230 nm, 0.95 ml/min.

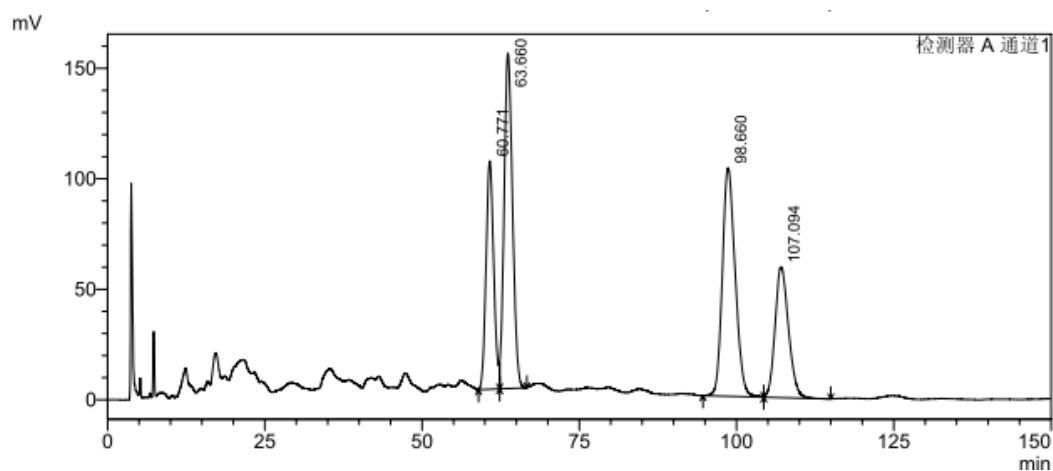

| Peak | Retention Time/min | Area % |
|------|--------------------|--------|
| 1    | 60.771             | 18.906 |
| 2    | 63.660             | 30.464 |
| 3    | 98.660             | 31.633 |
| 4    | 107.094            | 18.996 |

**Figure 34.** Enantioselective product of (*E*)-2-(2-nitrovinyl)thiophene and propyl aldehyde.

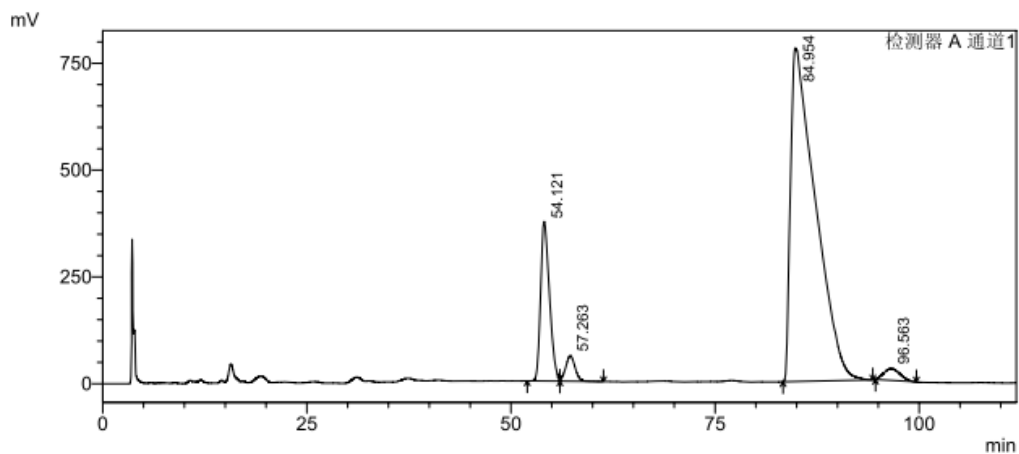

| Peak | Retention Time/min | Area % |
|------|--------------------|--------|
| 1    | 54.121             | 13.915 |
| 2    | 57.263             | 2.398  |
| 3    | 84.954             | 81.800 |
| 4    | 96.563             | 1.887  |

**Figure 35.** Racemic product of (*E*)-3-(2-nitrovinyl)pyridine and propyl aldehyde: Using Chiral OZ-H column, Hex: *i*-PrOH 75:25, UV 210 nm, 0.6 ml/min.

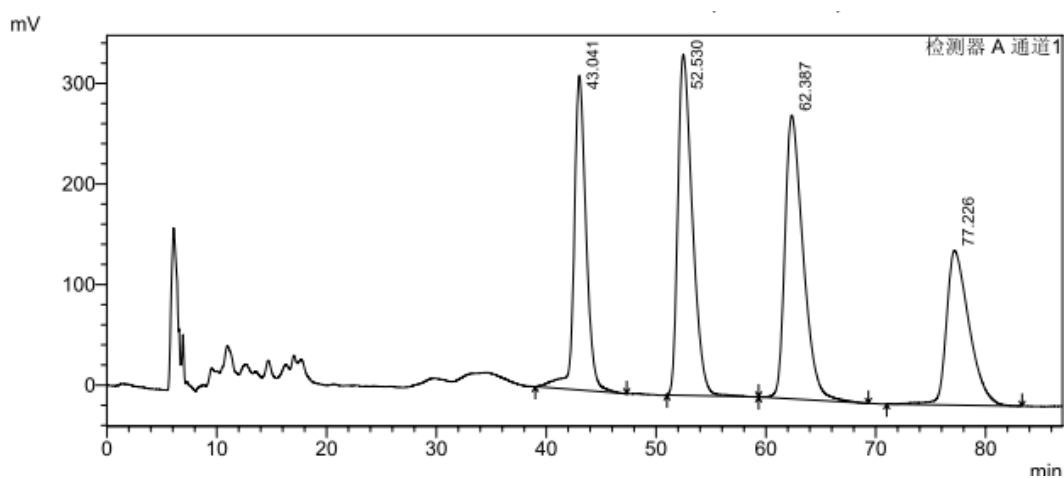

| Peak | Retention Time/min | Area % |
|------|--------------------|--------|
| 1    | 43.041             | 20.673 |
| 2    | 52.530             | 29.443 |
| 3    | 62.387             | 29.684 |
| 4    | 77.226             | 20.200 |

**Figure 36.** Enantioselective product of (*E*)-3-(2-nitrovinyl)pyridine and propyl aldehyde.

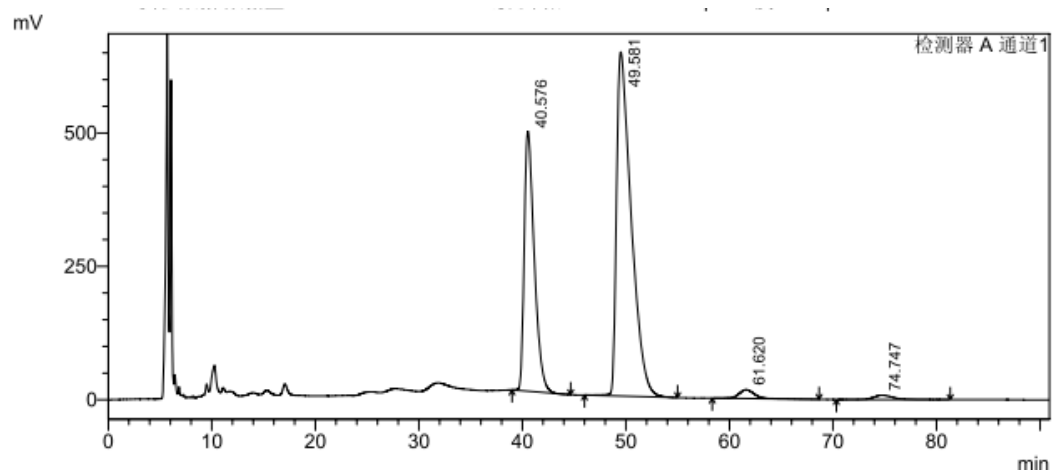

| Peak | Retention Time/min | Area % |
|------|--------------------|--------|
| 1    | 40.576             | 33.128 |
| 2    | 49.581             | 64.003 |
| 3    | 61.620             | 1.773  |
| 4    | 74.747             | 1.096  |

**Figure 37.** Racemic product of (*E*)-1-chloro-4-(2-nitrovinyl)benzene and isovaleraldehyde: Using Chiral OJ-H column, Hex: *i*-PrOH 85:15, UV 210 nm.

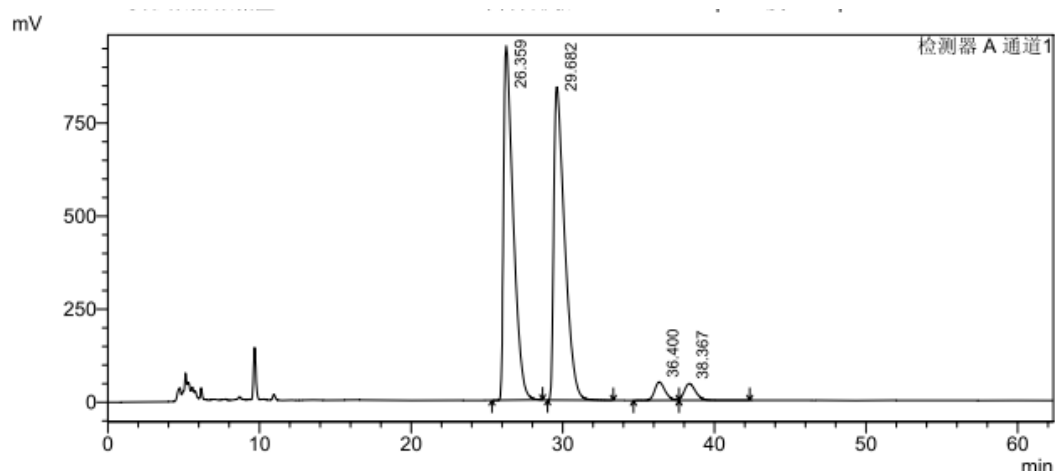

| Peak | Retention Time/min | Area % |
|------|--------------------|--------|
| 1    | 26.359             | 47.305 |
| 2    | 29.682             | 47.396 |
| 3    | 36.400             | 2.661  |
| 4    | 38.367             | 2.638  |

**Figure 38.** Enantioselective product of (*E*)-1-chloro-4-(2-nitrovinyl)benzene and isovaleraldehyde.

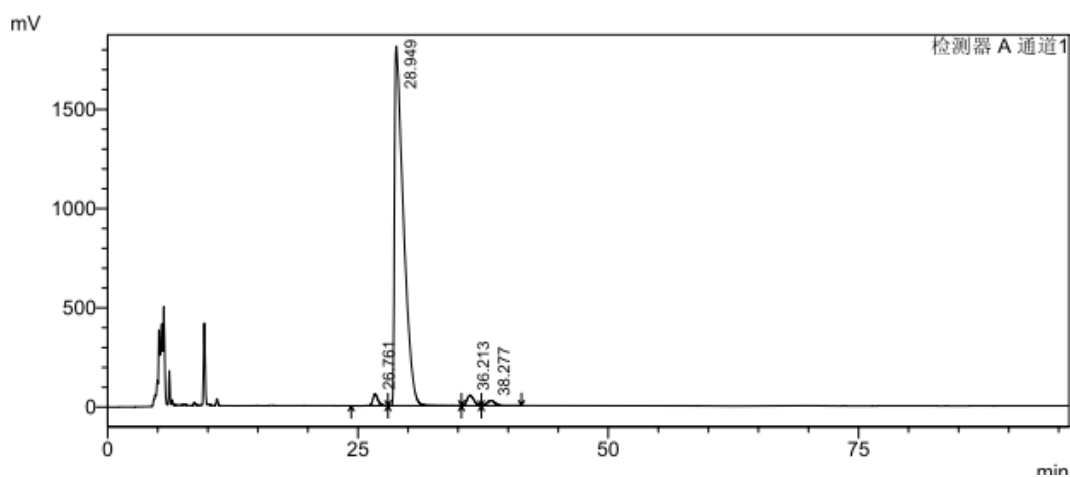

| Peak | Retention Time/min | Area % |
|------|--------------------|--------|
| 1    | 26.761             | 1.680  |
| 2    | 28.949             | 94.868 |
| 3    | 36.213             | 2.155  |
| 4    | 38.277             | 1.164  |

**Figure 39.** Racemic product of (*E*)-1-methoxy-2-(2-nitrovinyl)benzene and isovaleraldehyde:  
Using Chiral OJ-H column, Hex: *i*-PrOH 96:4, UV 210 nm, 0.8 ml/min.

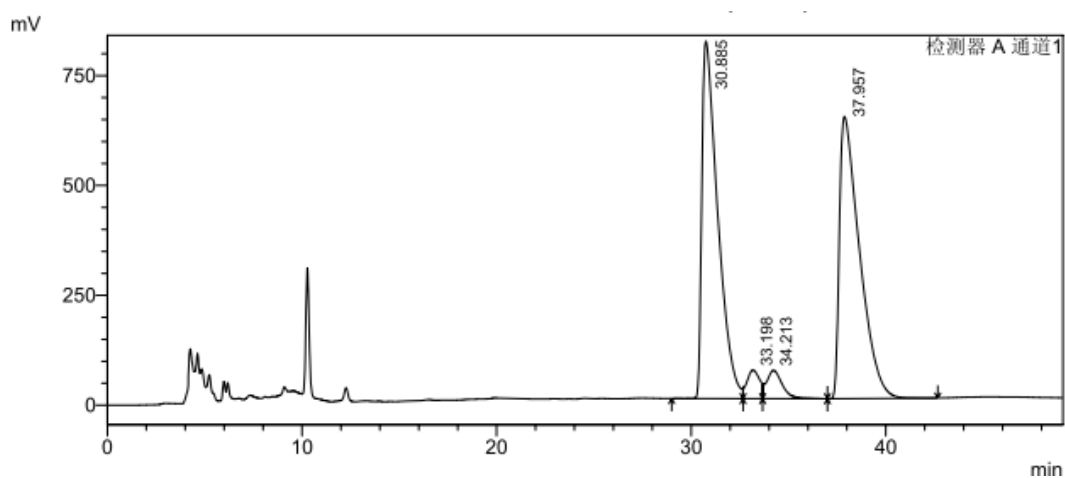

| Peak | Retention Time/min | Area % |
|------|--------------------|--------|
| 1    | 30.885             | 46.624 |
| 2    | 33.198             | 2.918  |
| 3    | 34.213             | 3.681  |
| 4    | 37.957             | 46.777 |

**Figure 40.** Enantioselective product of (*E*)-1-methoxy-2-(2-nitrovinyl)benzene and isovaleraldehyde.

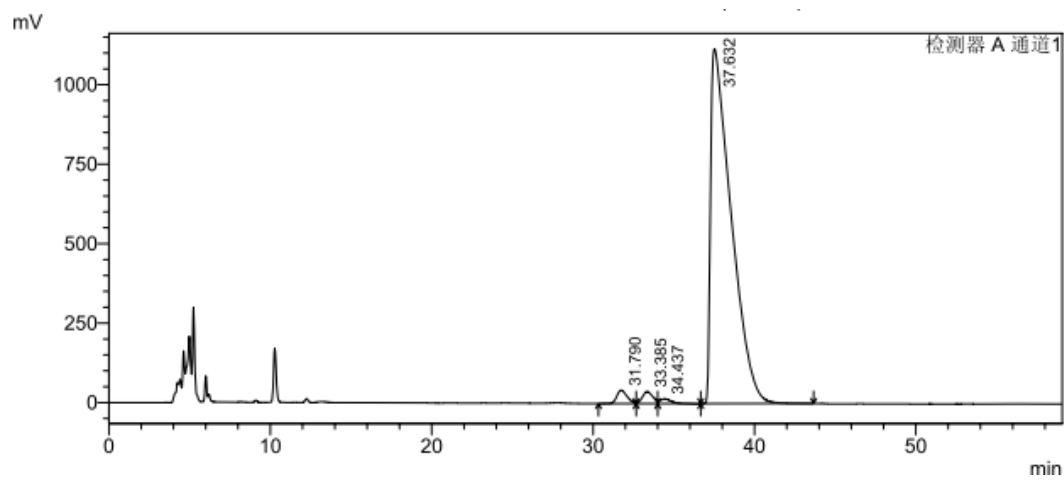

| Peak | Retention Time/min | Area % |
|------|--------------------|--------|
| 1    | 31.790             | 1.799  |
| 2    | 33.385             | 1.623  |
| 3    | 34.437             | 0.712  |
| 4    | 37.632             | 95.865 |

## 5. NMR Spectrum

$^1\text{H}$  NMR (400 MHz,  $\text{CDCl}_3$ ) **6aa**

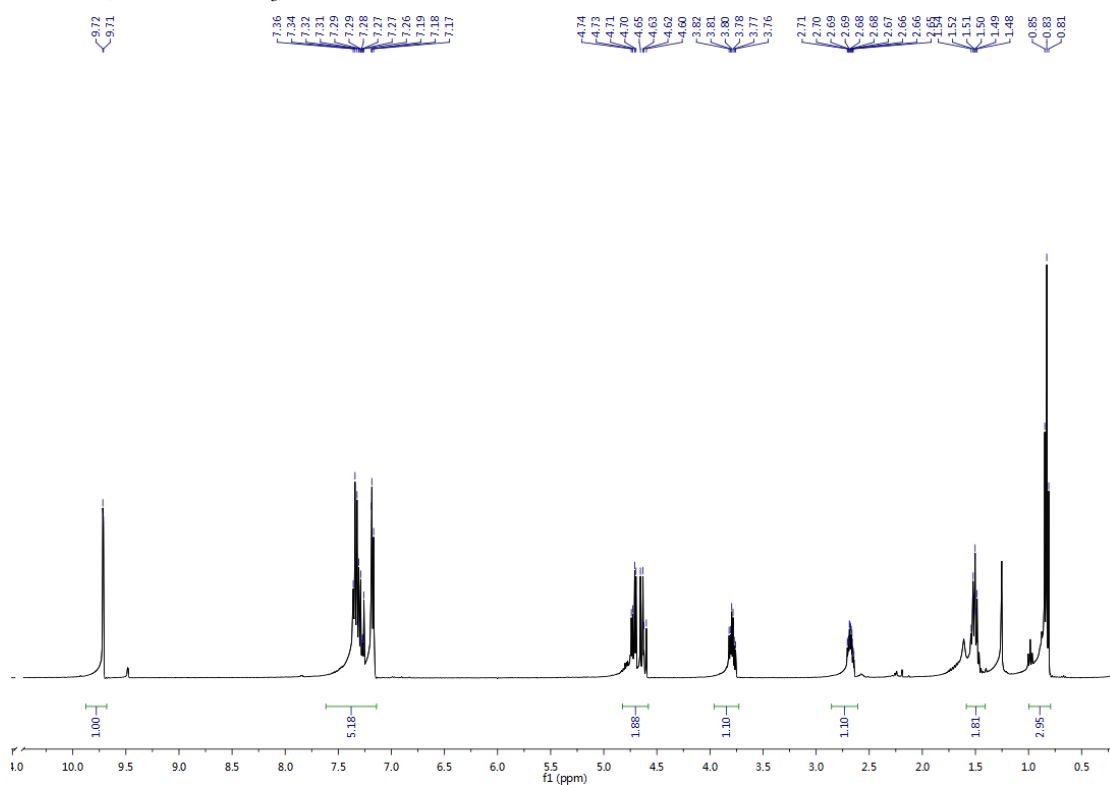

$^1\text{H}$  NMR (400 MHz,  $\text{CDCl}_3$ ) **6ba**

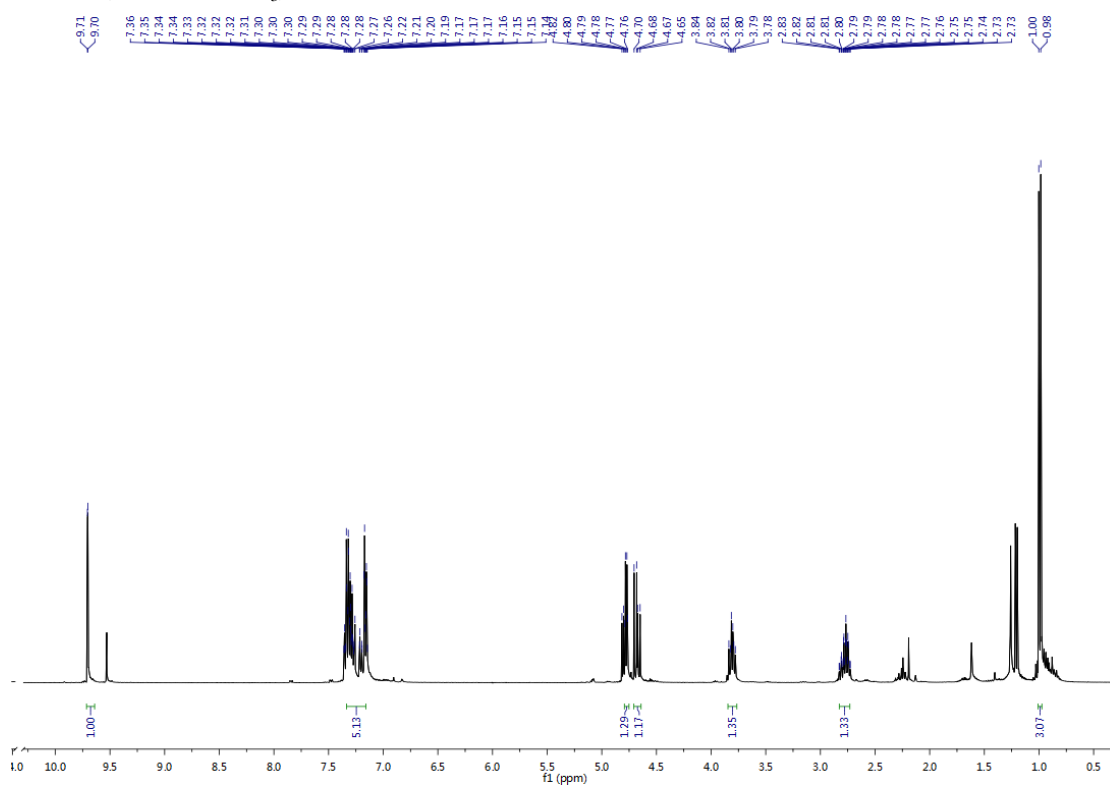

<sup>1</sup>H NMR (400 MHz, CDCl<sub>3</sub>) **6ca**

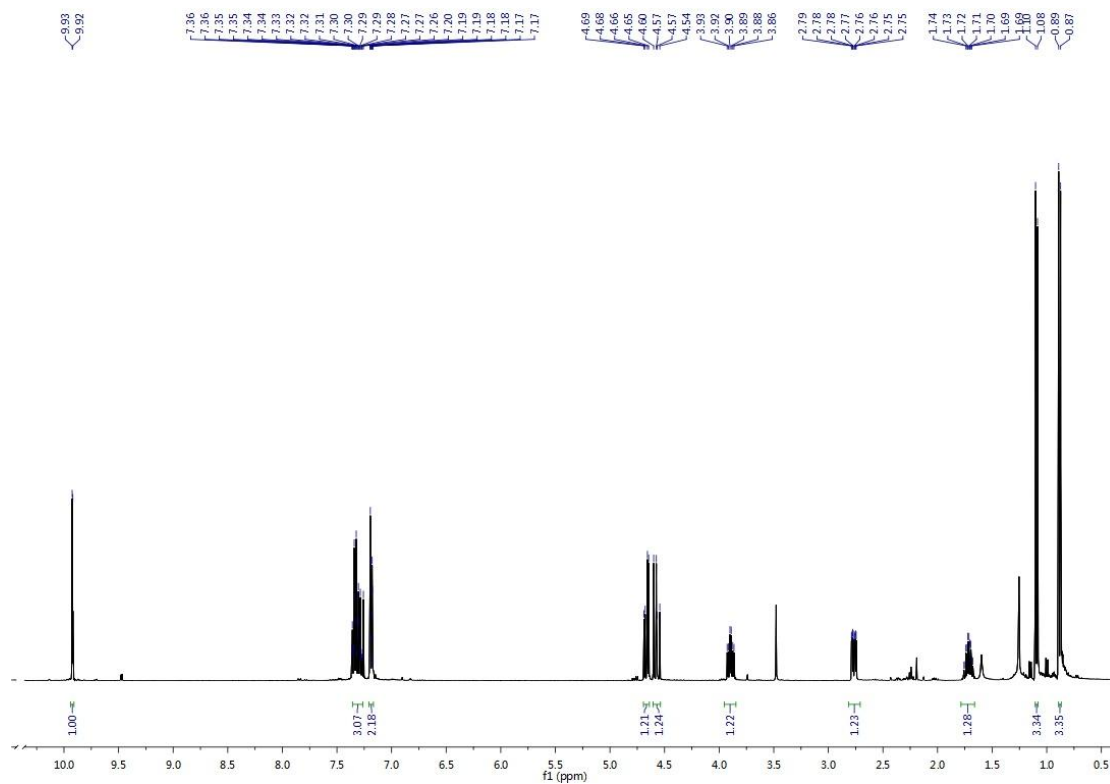

<sup>1</sup>H NMR (400 MHz, CDCl<sub>3</sub>) **6ea**

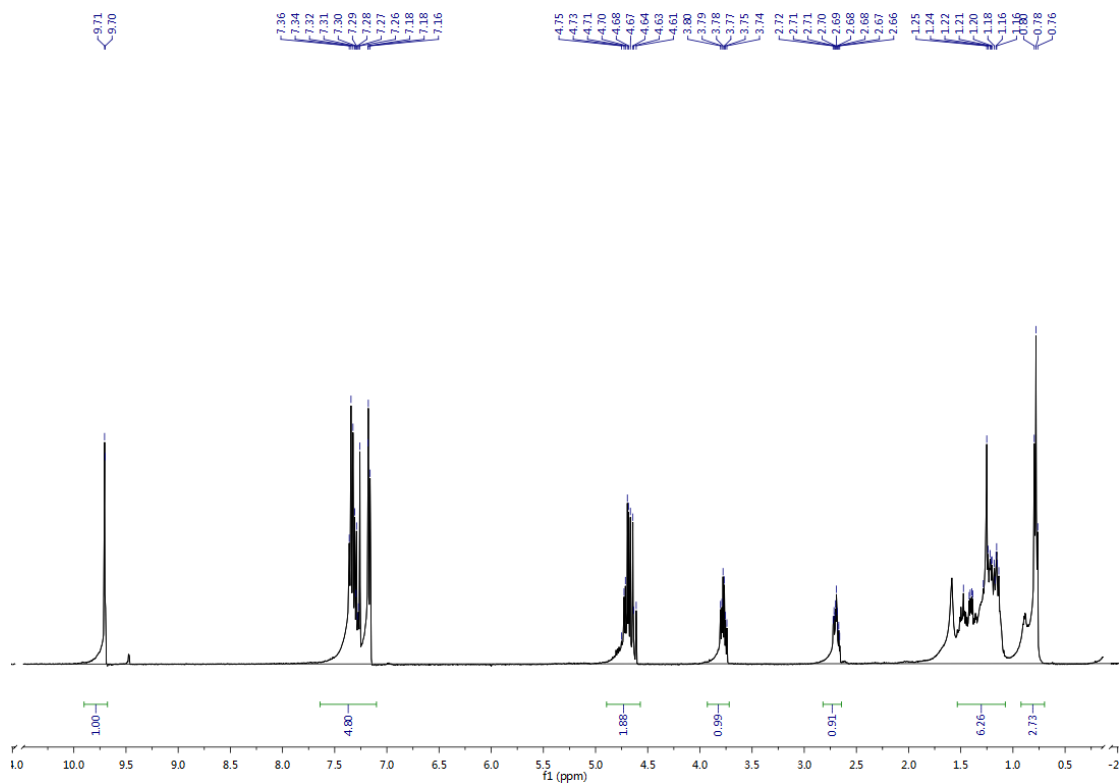



$^1\text{H}$  NMR (400 MHz,  $\text{CDCl}_3$ ) **6bb**

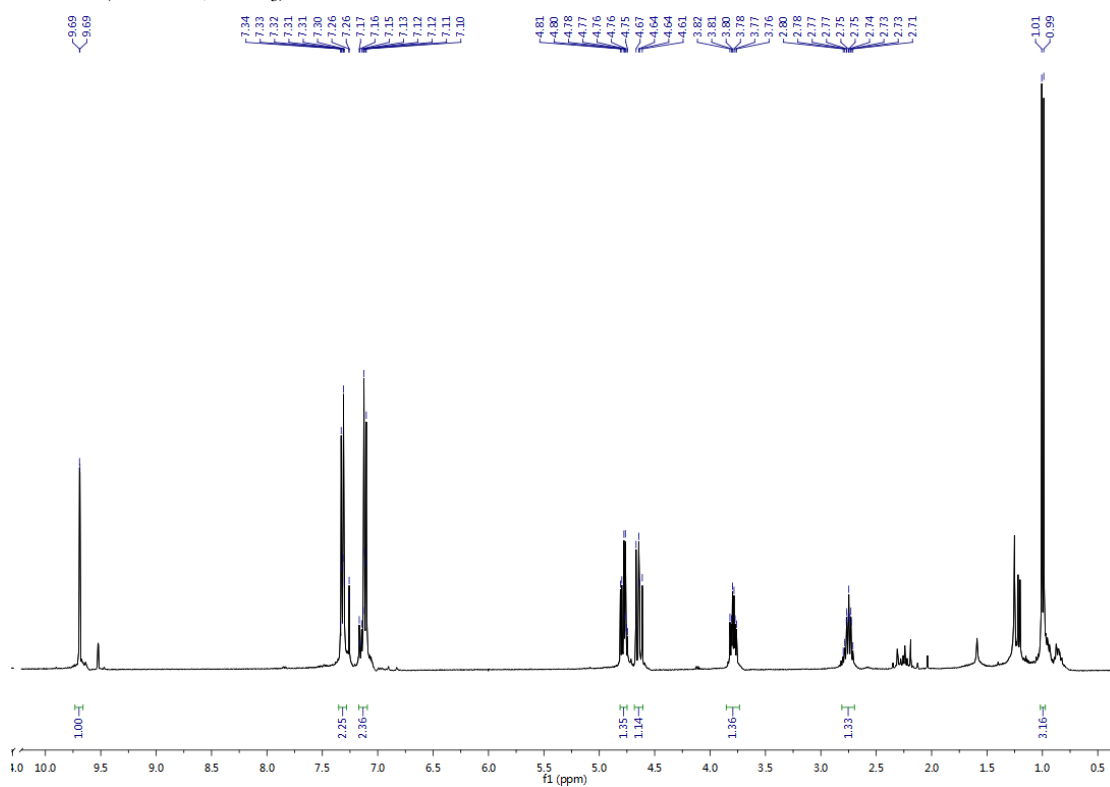

$^1\text{H}$  NMR (400 MHz,  $\text{CDCl}_3$ ) **6bc**

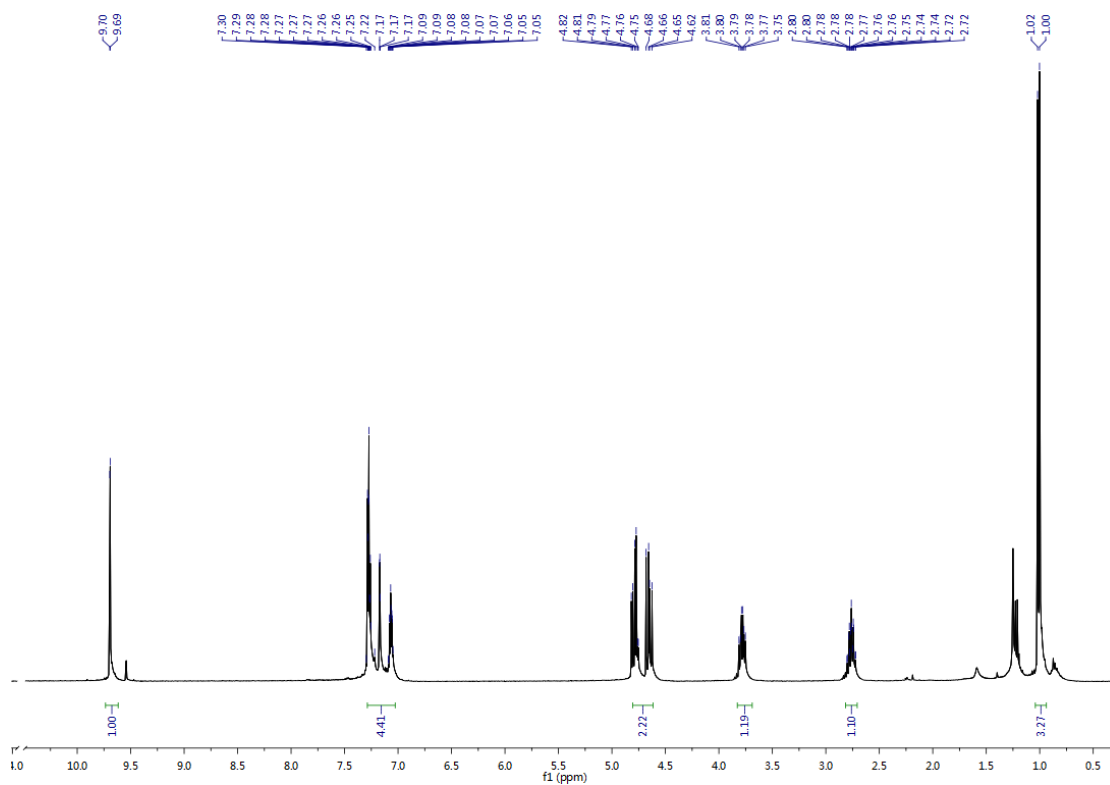

<sup>1</sup>H NMR (400 MHz, CDCl<sub>3</sub>) **6bd**

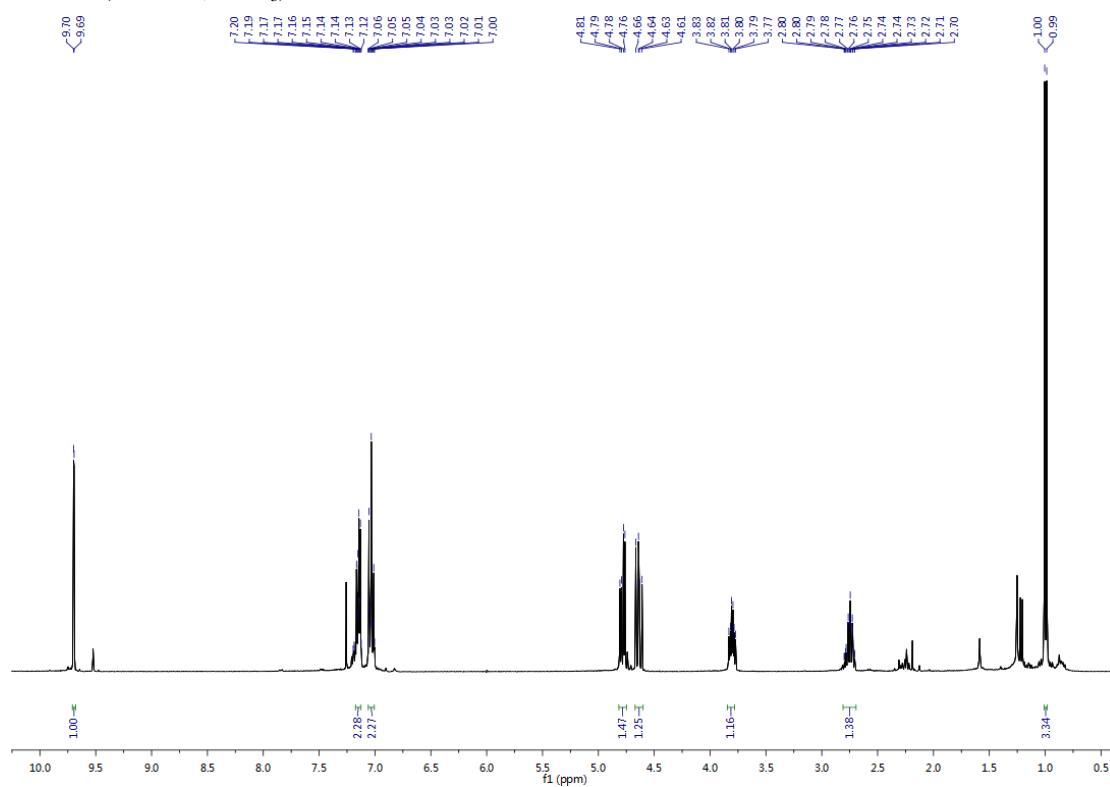

<sup>1</sup>H NMR (400 MHz, CDCl<sub>3</sub>) **6be**

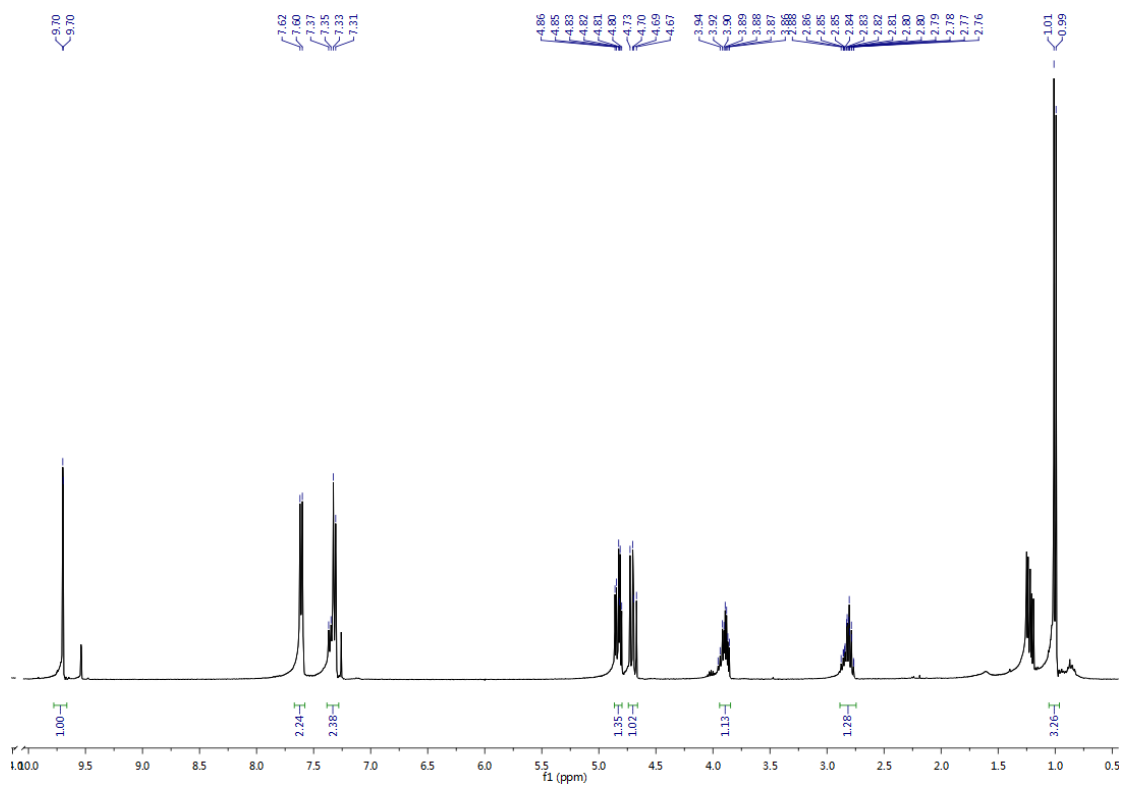

<sup>1</sup>H NMR (400 MHz, CDCl<sub>3</sub>) **6bf**

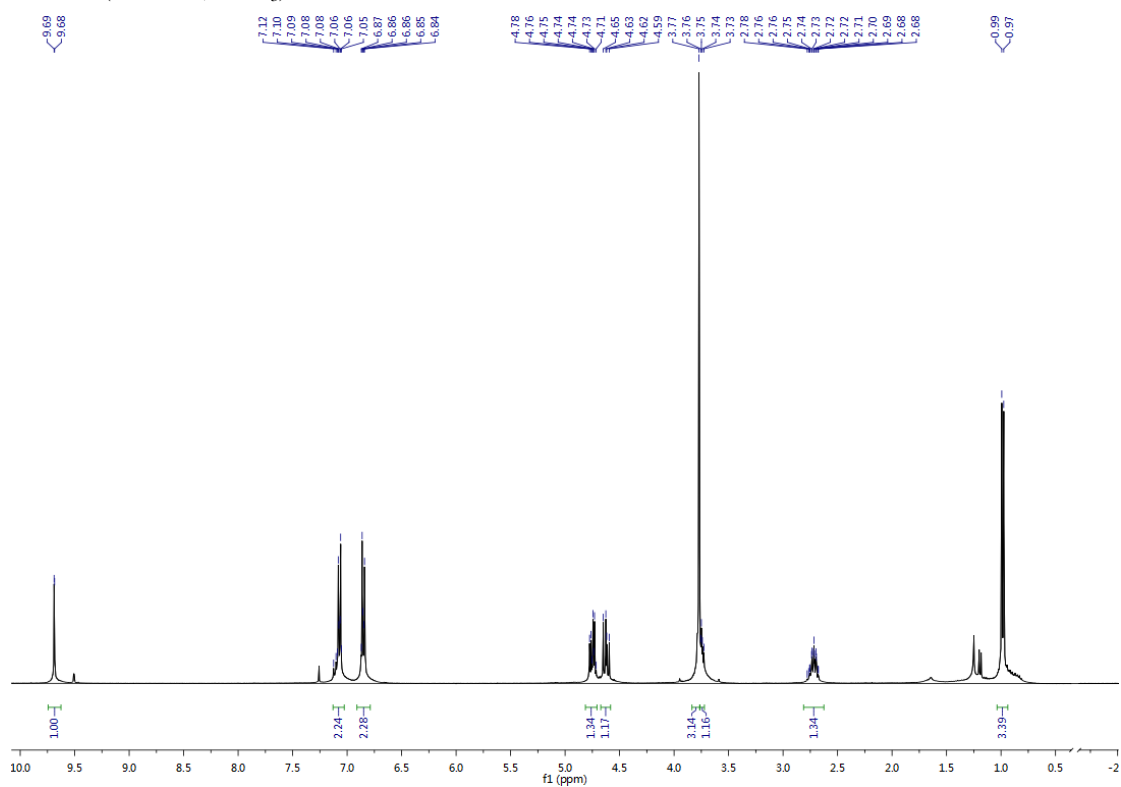

<sup>1</sup>H NMR (400 MHz, CDCl<sub>3</sub>) **6bg**

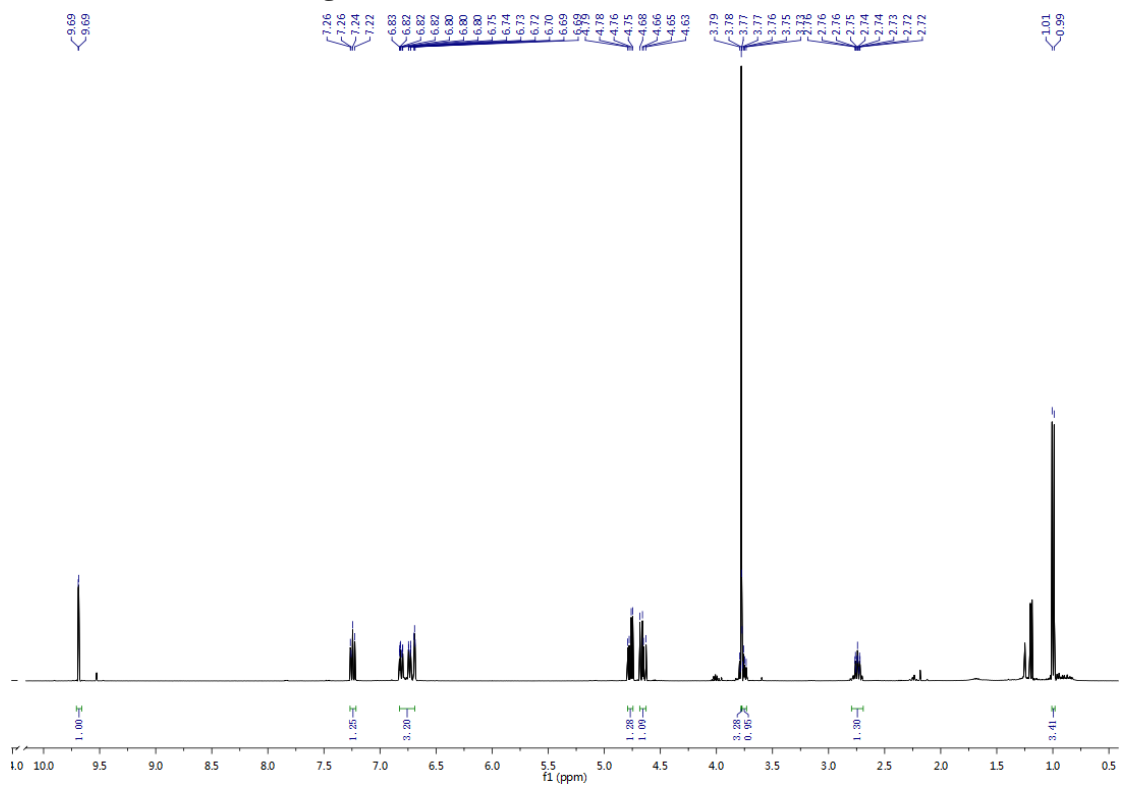

$^{13}\text{C}$  NMR (100 MHz,  $\text{CDCl}_3$ ) **6bg**

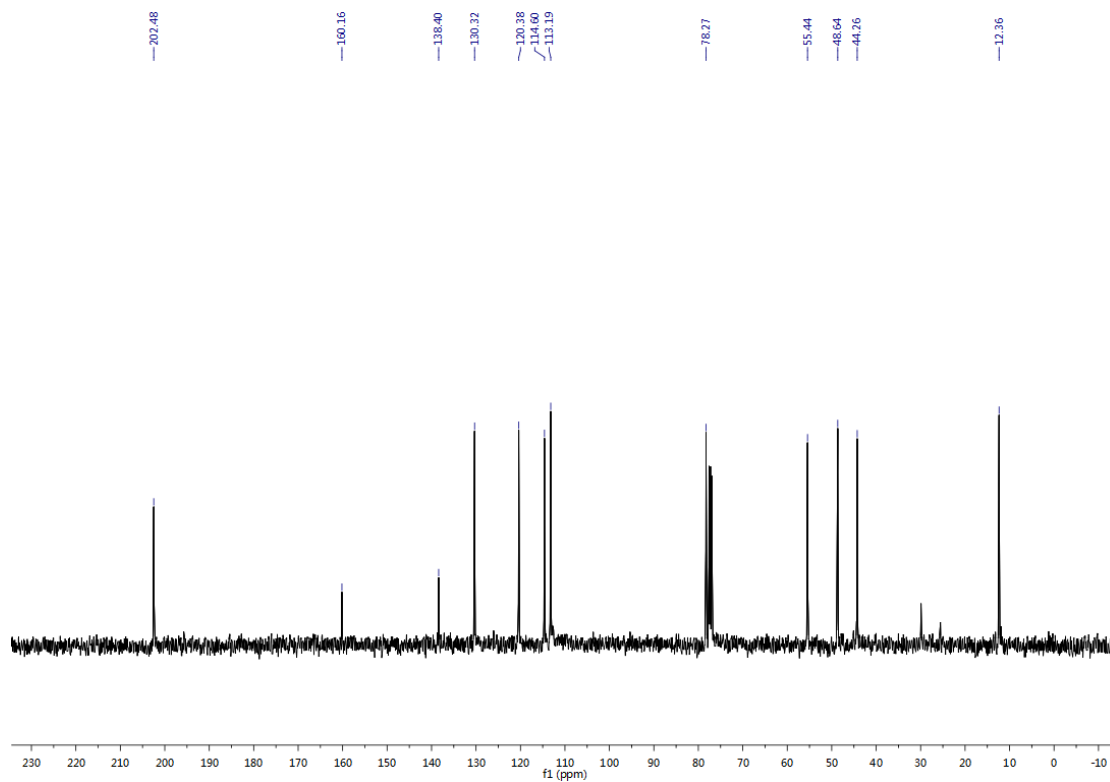

$^1\text{H}$  NMR (400 MHz,  $\text{CDCl}_3$ ) **6bh**

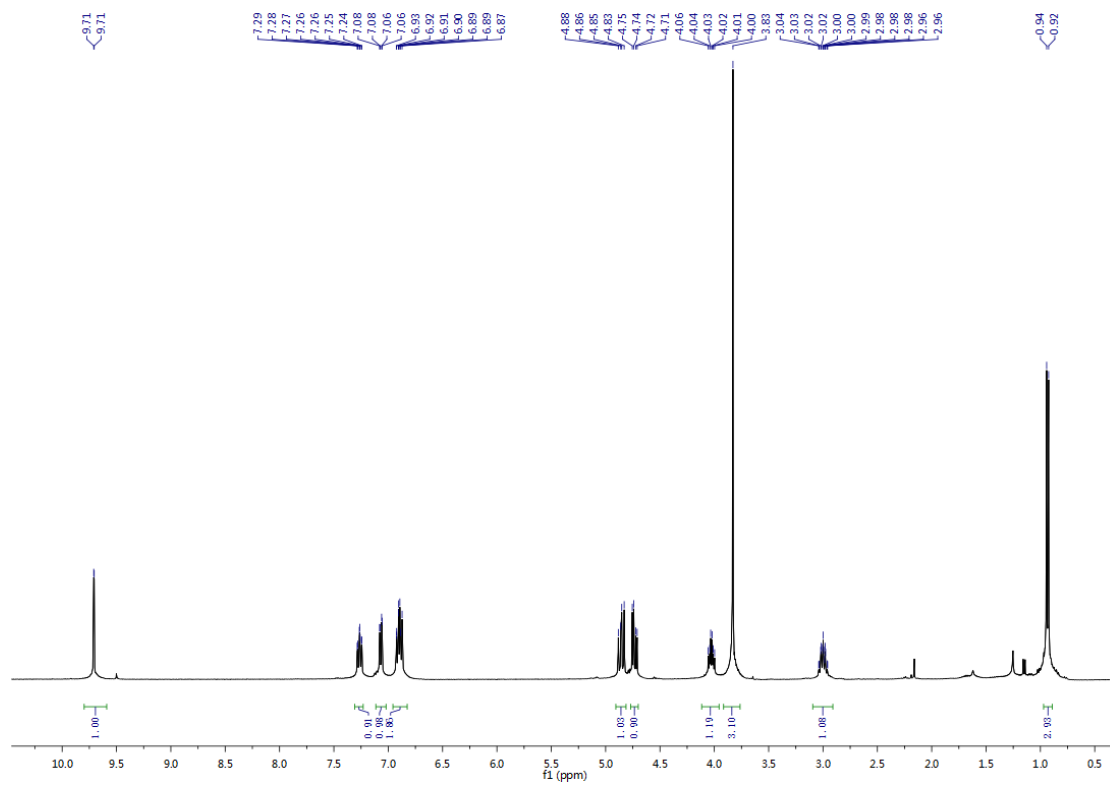

$^1\text{H}$  NMR (400 MHz,  $\text{CDCl}_3$ ) **6bi**

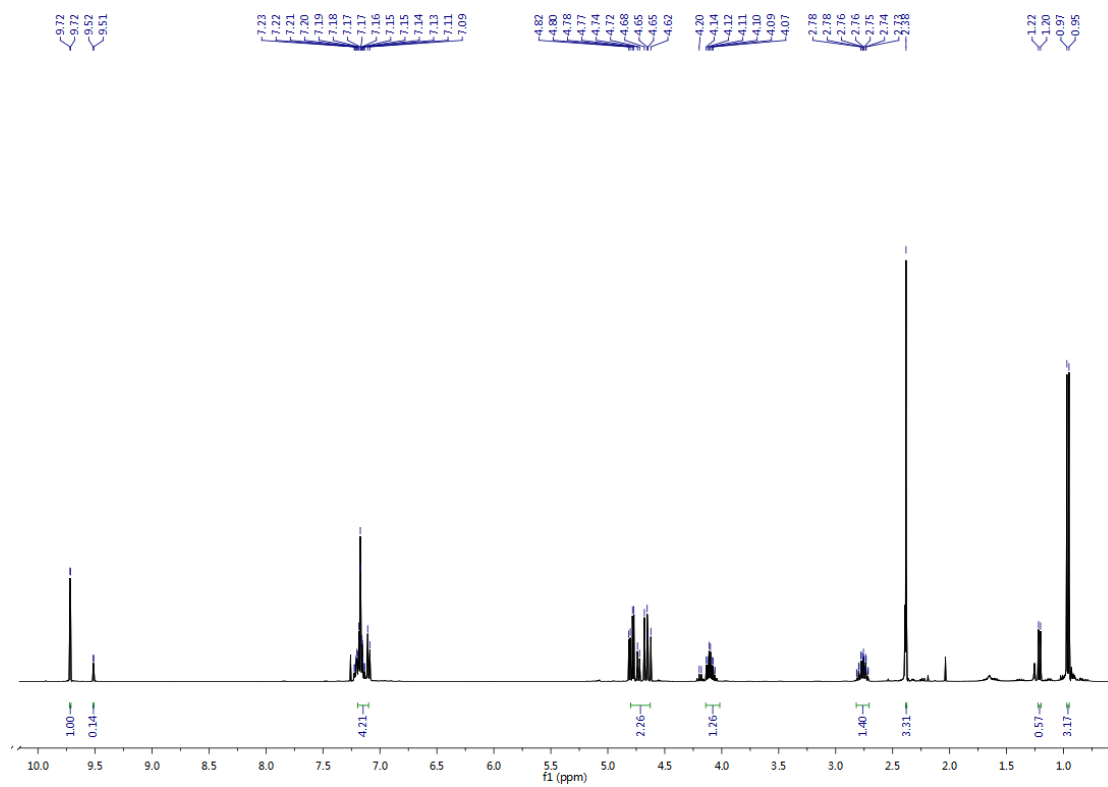

$^1\text{H}$  NMR (400 MHz,  $\text{CDCl}_3$ ) **6bj**

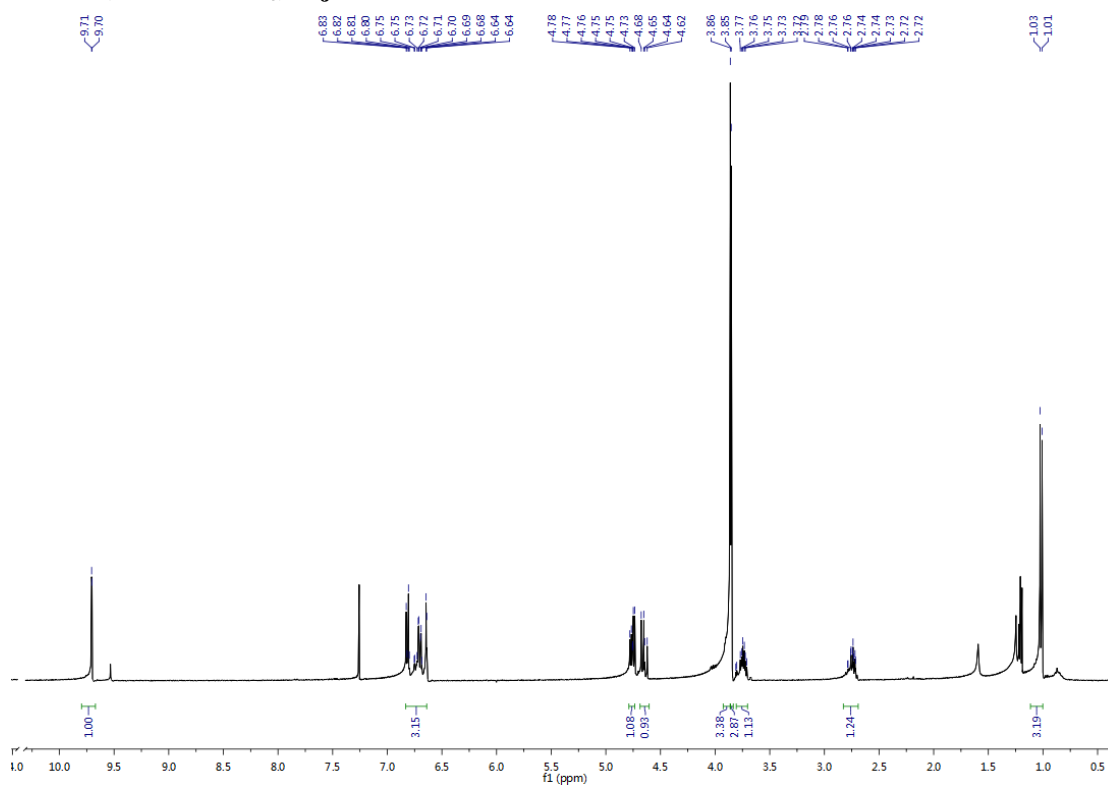

$^{13}\text{C}$  NMR (100 MHz,  $\text{CDCl}_3$ ) **6bj**

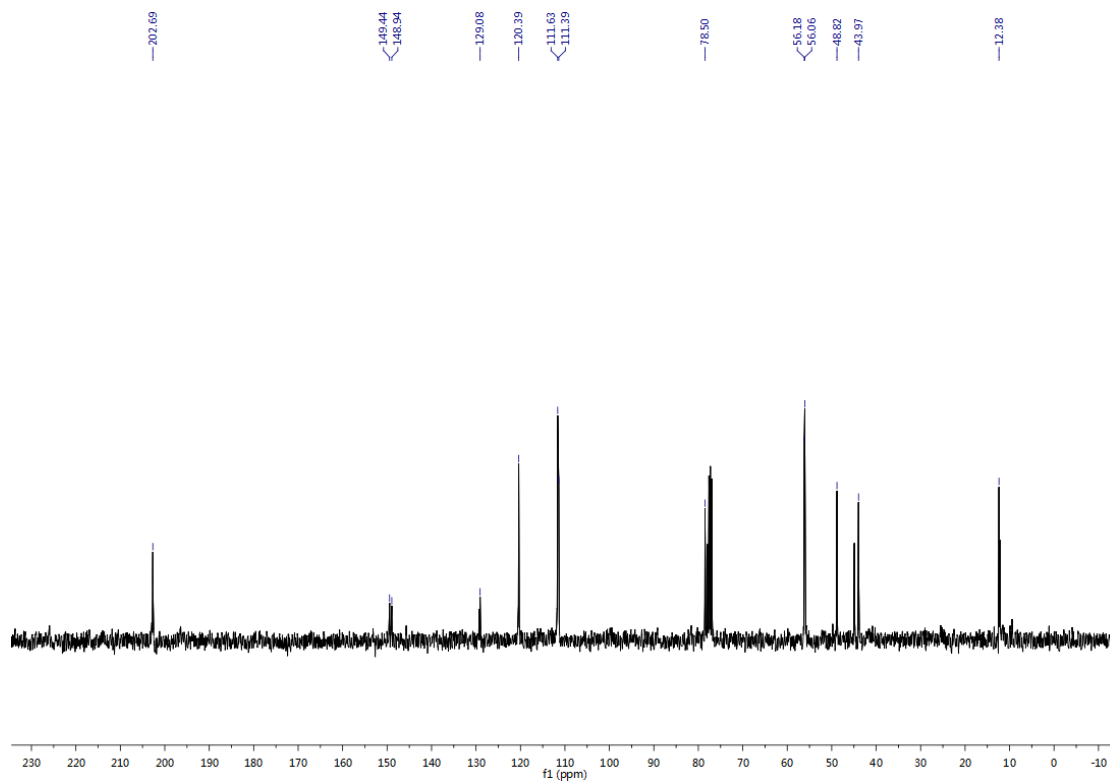

$^1\text{H}$  NMR (400 MHz,  $\text{CDCl}_3$ ) **6bk**

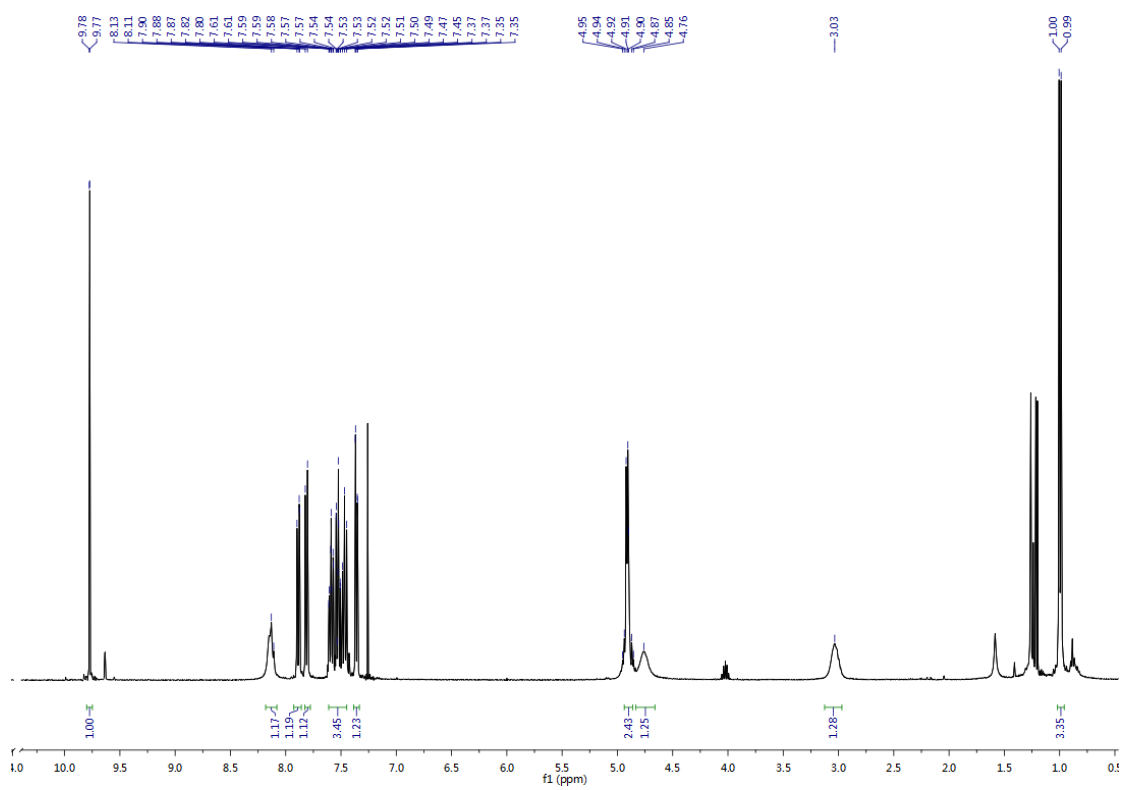

$^1\text{H}$  NMR (400 MHz,  $\text{CDCl}_3$ ) **6bl**

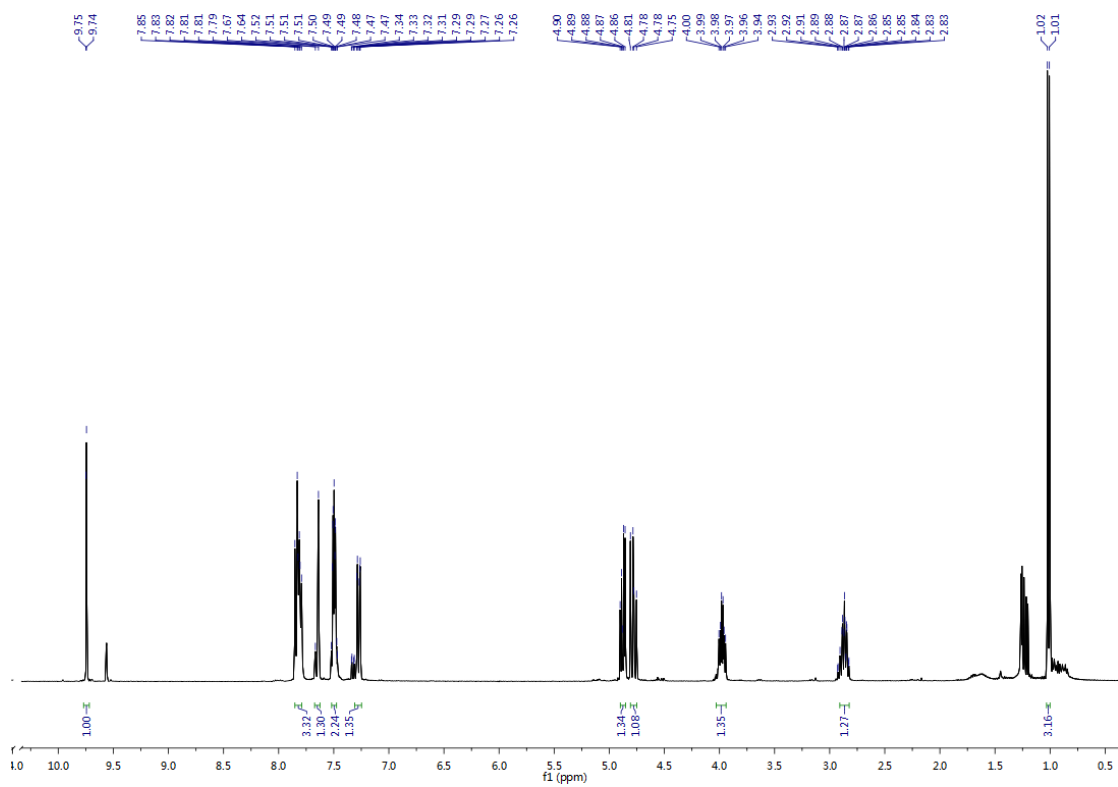

$^1\text{H}$  NMR (400 MHz,  $\text{CDCl}_3$ ) **6bm**

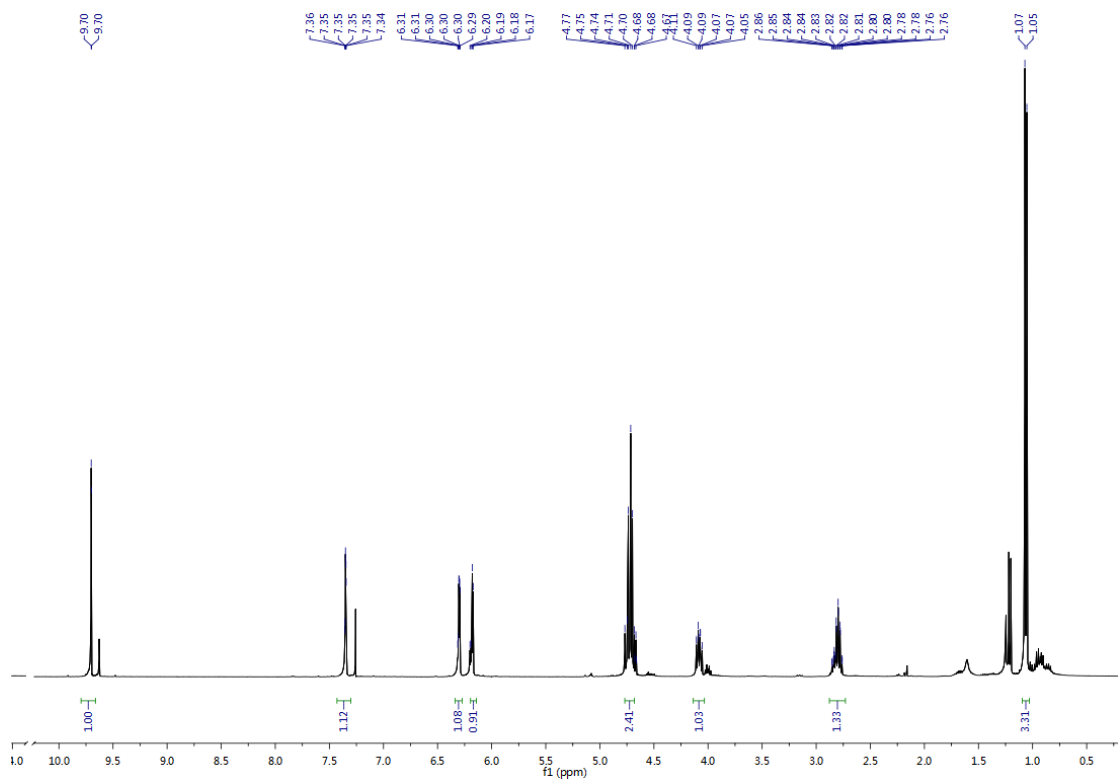

$^1\text{H}$  NMR (400 MHz,  $\text{CDCl}_3$ ) **6bn**

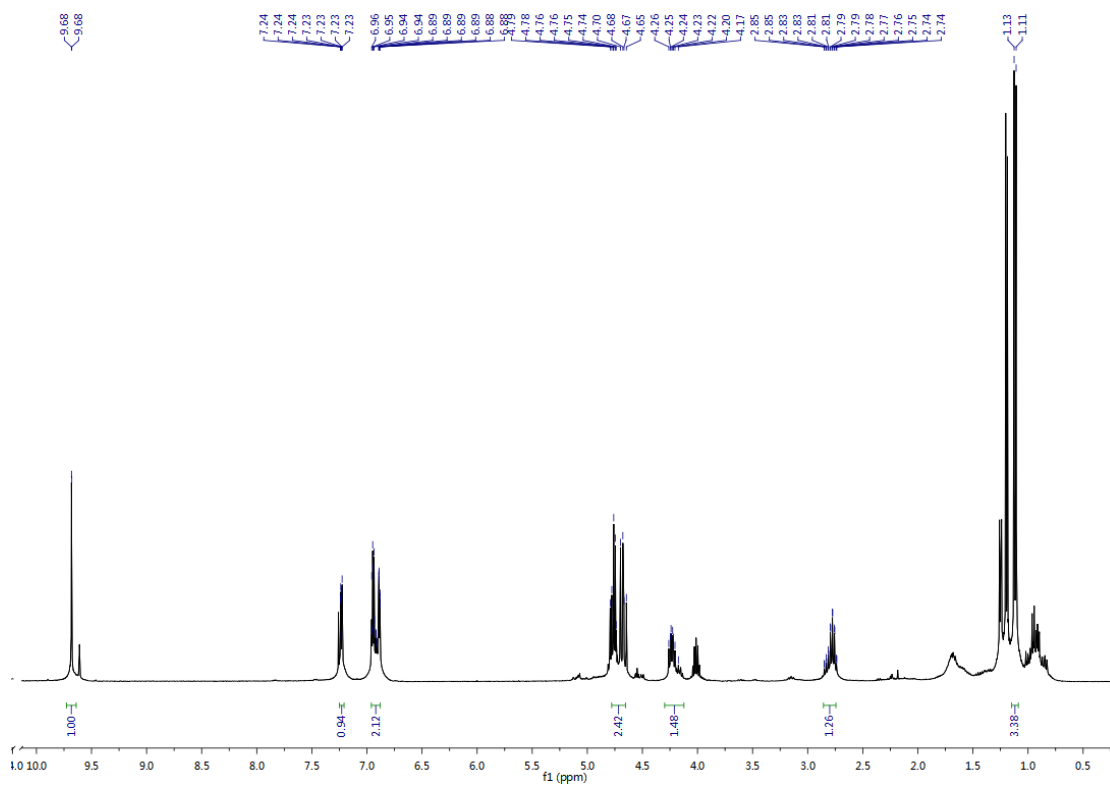

$^1\text{H}$  NMR (400 MHz,  $\text{CDCl}_3$ ) **6bo**

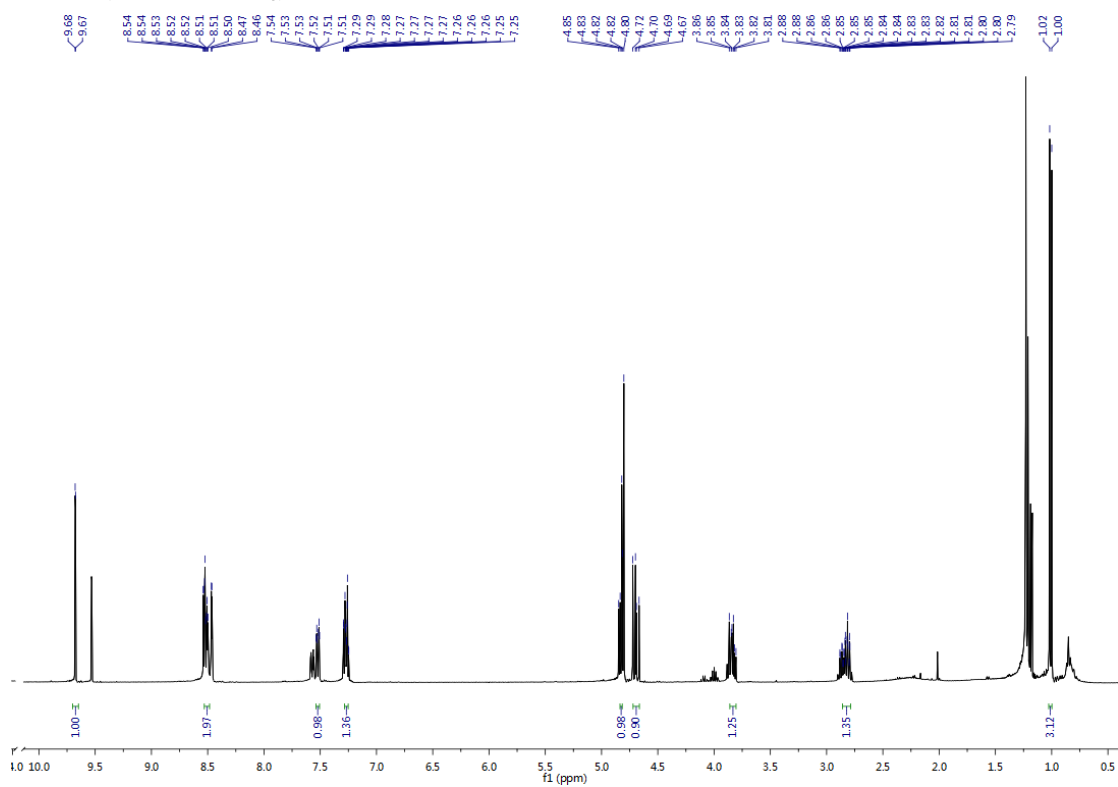



$^{13}\text{C}$  NMR (100 MHz,  $\text{CDCl}_3$ ) **6bo**

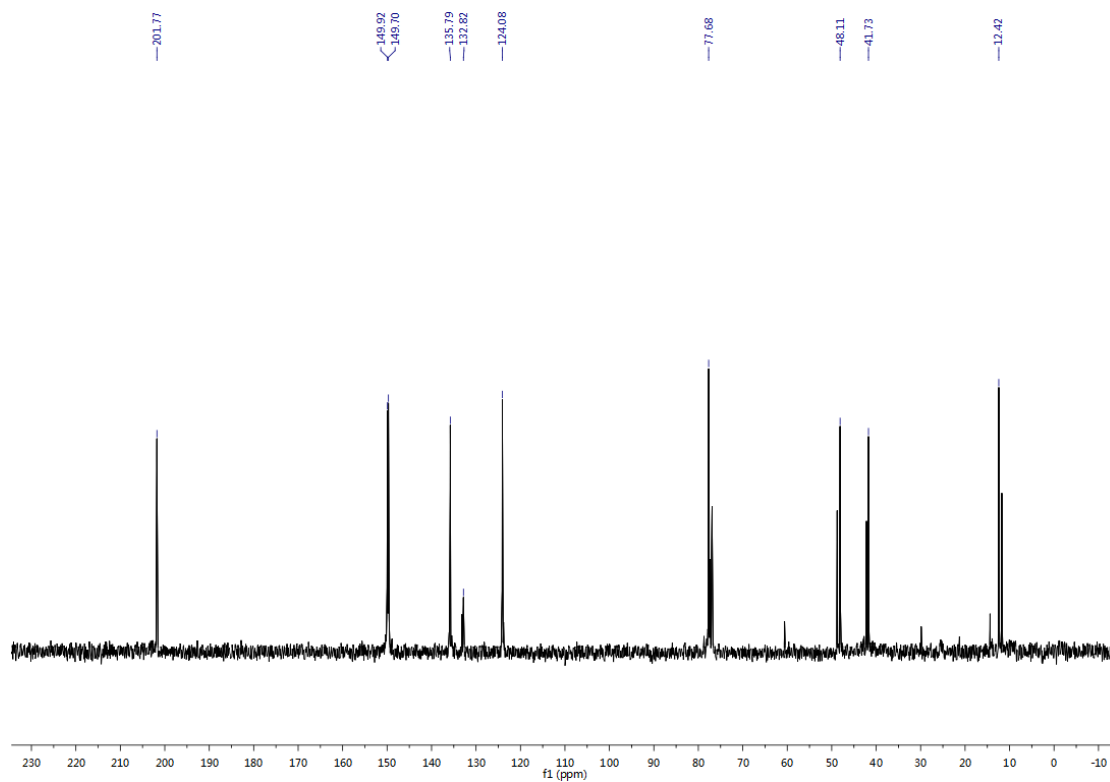

$^1\text{H}$  NMR (400 MHz,  $\text{CDCl}_3$ ) **6cb**

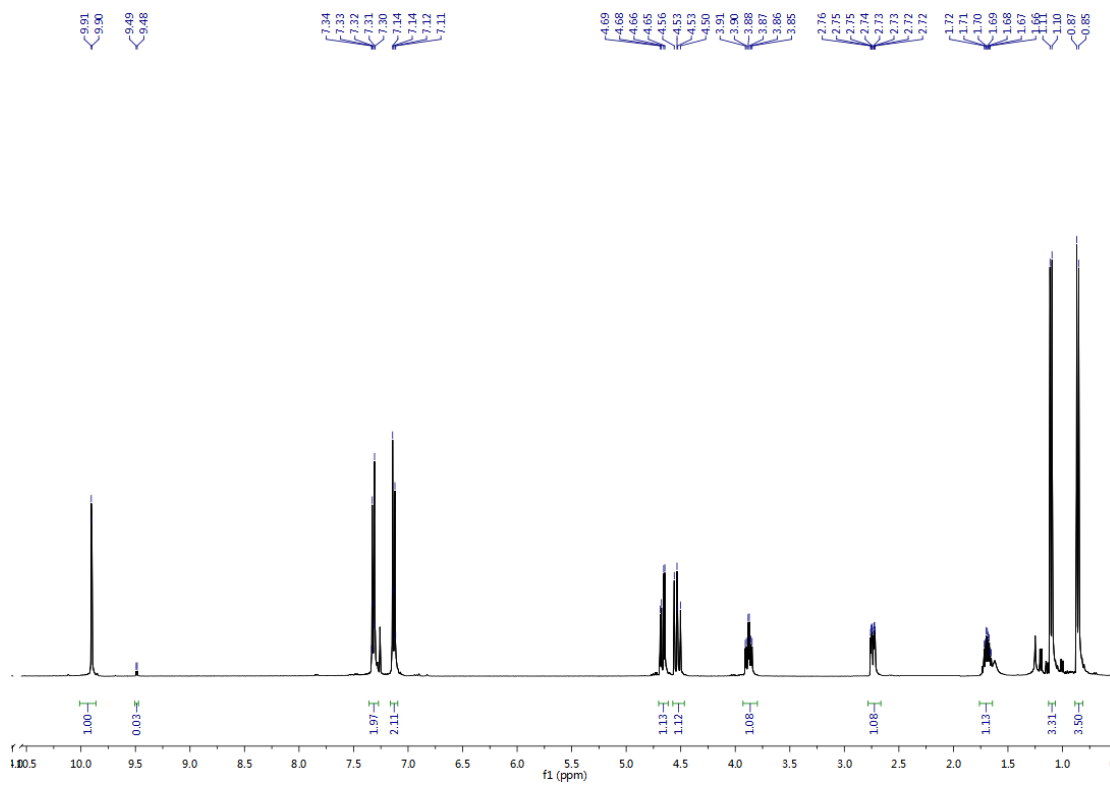

$^{13}\text{C}$  NMR (100 MHz,  $\text{CDCl}_3$ ) **6cb**

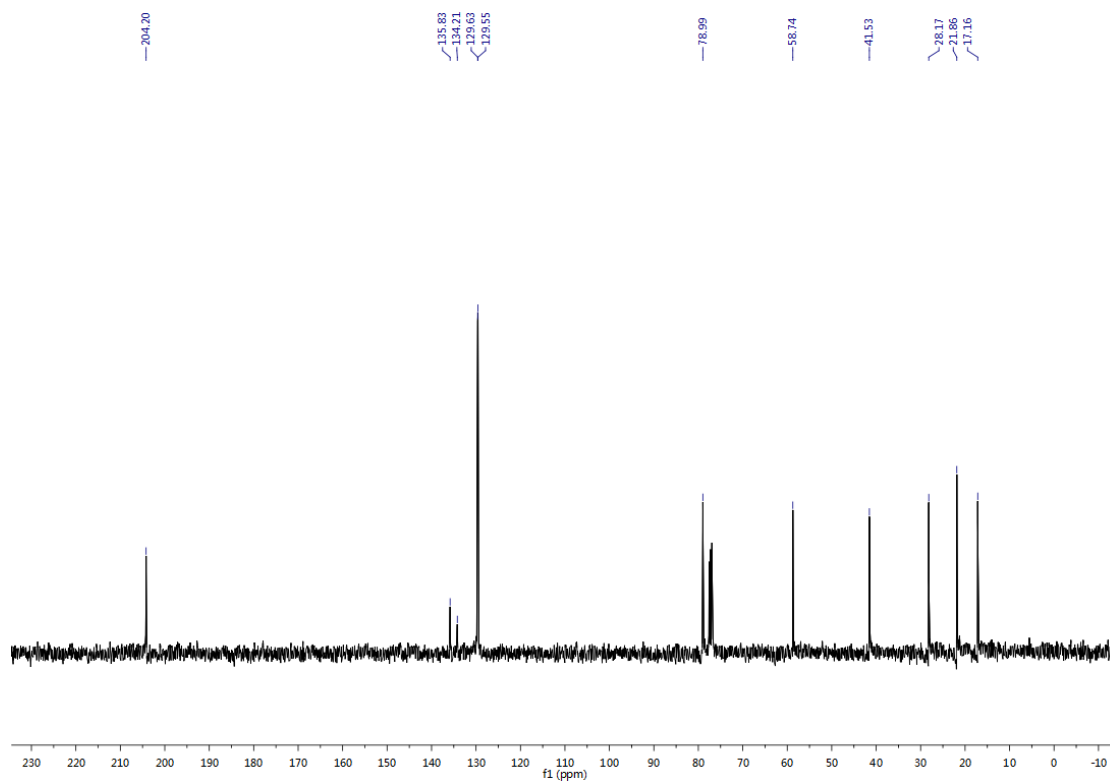

$^1\text{H}$  NMR (400 MHz,  $\text{CDCl}_3$ ) **6cc**

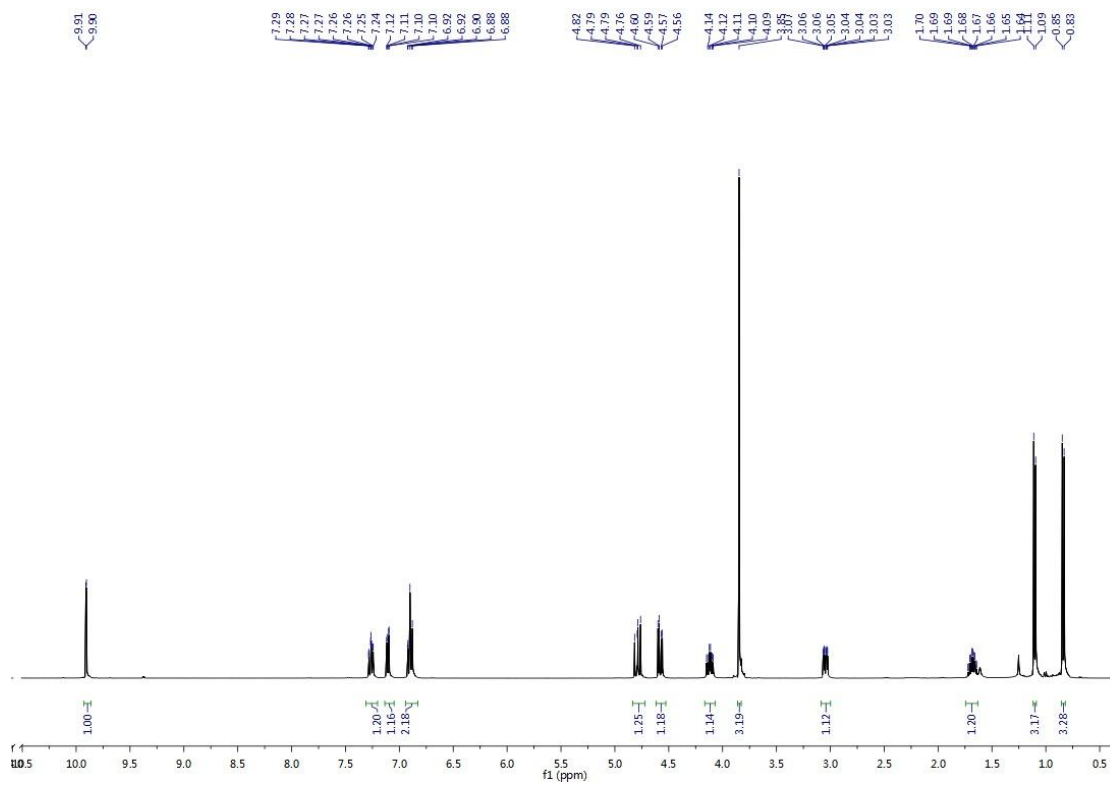

$^{13}\text{C}$  NMR (100 MHz,  $\text{CDCl}_3$ ) **6cc**

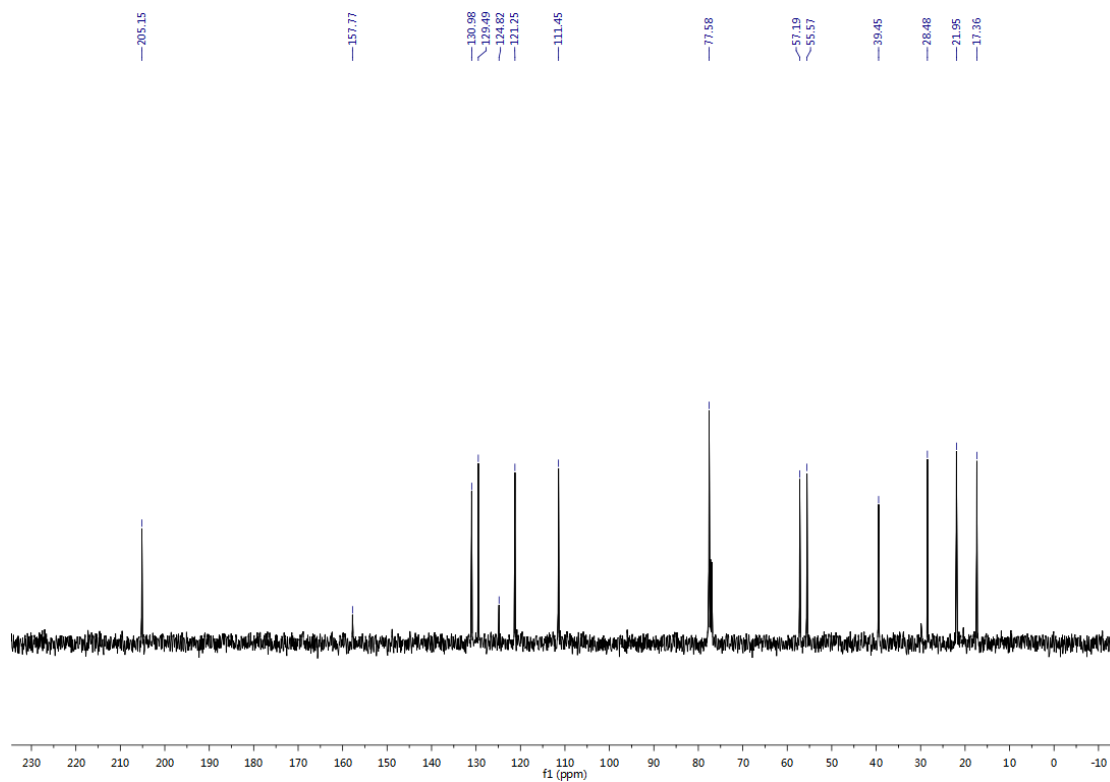

Supplement: c2ob00003b.pdf [file c2ob00003b.pdf]
